# Supplementary material
Source: MDPI journal article supplement (https://www.mdpi.com/2073-4441/8/12/579)
Supplement: s1 [file s1]

## Sheet: Summary
Author	Year	General MAR type	Specific MAR technique	Model used	Groundwater flow	unsaturated flow	non-reactive/solute transport	reactive transport	Water Management /Watershed	Specific objective	Main objective	Main objective 2	Country of Field site/Theoretical analysis/Laboratory experiment	Full Citation
Abbo and Gev	2008	Spreading methods	Infiltration ponds & basins	MODFLOW, MT3DMS (non-reactive)	x		x			GM, O	Impact on Groundwater	Optimization/Planning of System	Israel	Abbo, H., Gev, I., 2008. Numerical model as a predictive analysis tool for rehabilitation and conservation of the Israeli Coastal Aquifer: example of the SHAFDAN Sewage Reclamation project. Desalination 226, 47–55. doi:10.1016/j.desal.2007.01.233
Akiyama et al.	1998	Well, shaft & borehole recharge	ASR/ ASTR	geologic numerical analysis	x					GM	Impact on Groundwater		Japan	Akiyama, J., Katsuragi, Y., Goto, N., Abiko, H., Yokoyama, T., 1998. Simulation of the influence of recharged cold groundwater on temperature and level of surrounding groundwater, in: International Symposium on Artificial Recharge of Ground Water, Peters, J.H. (Eds.), Artificial Recharge of Groundwater: Proceedings of the Third International Symposium on Artificial Recharge of Groundwater : TISAR…
Anderson et al.	2006	Well, shaft & borehole recharge	ASR/ ASTR	PHREEQC				x		GP	Geochemical Processes		United Kingdom	Anderson, M., Dewhurst, R., Jones, M., Baxter, K., 2006. Characterisation of turbidity and well clogging processes in a double porosity Chalk aquifer during the South London Artificial Recharge Scheme trials, in: UNESCO (Ed.), Recharge Systems for Protecting and Enhancing Groundwater Resources - Proceedings of the 5th International Symposium on Management of Aquifer Recharge ISMAR 5, Berlin, Germ…
Antoniou et al.	2012	Well, shaft & borehole recharge	ASR/ ASTR	REACTIONS+				x		GP	Geochemical Processes		Netherlands	Antoniou, E.A., van Breukelen, B.M., Putters, B., Stuyfzand, P.J., 2012. Hydrogeochemical patterns, processes and mass transfers during aquifer storage and recovery (ASR) in an anoxic sandy aquifer. Applied Geochemistry 27, 2435–2452. doi:10.1016/j.apgeochem.2012.09.006
Antoniou et al.	2013	Well, shaft & borehole recharge	ASR/ ASTR	PHREEQC				x		F, GP	Geochemical Processes		Netherlands	Antoniou, E.A., Stuyfzand, P.J., van Breukelen, B.M., 2013. Reactive transport modeling of an aquifer storage and recovery (ASR) pilot to assess long-term water quality improvements and potential solutions. Applied Geochemistry 35, 173–186. doi:10.1016/j.apgeochem.2013.04.009
Appelo et al.	1999	Well, shaft & borehole recharge	ASR/ ASTR	PHREEQC				x		GP	Geochemical Processes		Laboratory experiment	Appelo, C.A.J., Drijver, B., Hekkenberg, R., Jonge, M., 1999. Modeling In Situ Iron Removal from Ground Water. Ground Water 37, 811–817. doi:10.1111/j.1745-6584.1999.tb01179.x
Azaroual et al.	2012	Spreading methods	Infiltration ponds & basins	MARTHE, MARTHE-REACT, PHREEQC, MIN3P		x	x	x		SAT, WQ, GP	Geochemical Processes		Laboratory experiment	Azaroual, M., Thiéry, D., Amraoui, N., Pettenati, M., Croiset, N., Casanova, J., Besnard, K., Rampnoux, N., 2012. Physical, geochemical and microbial processes induced during the aquifer recharge using treated wastewaters: laboratory and pilot experiments and numerical simulations, in: Draeger, M. (Ed.), Achieving Groundwater Supply Sustainability & Reliability through Managed Aquifer Recharge - …
Bakker	2010	Well, shaft & borehole recharge	ASR/ ASTR	numerical solution of radial Dupuit interface flow	x		x			RE, SI	Recovery efficiency		Theoretical analysis	Bakker, M., 2010. Radial Dupuit interface flow to assess the aquifer storage and recovery potential of saltwater aquifers. Hydrogeology Journal 18, 107–115. doi:10.1007/s10040-009-0508-1
Banton and Klisch	2007	Well, shaft & borehole recharge	ASR/ ASTR	MODFLOW	x					GM	Impact on Groundwater		USA	Banton, D., Klisch, M., 2007. Aquifer Storage and Recovery in a Compartmentalized Basalt Aquifer Ssystem, Walla Walla, Washington, in: Fox, P. (Ed.), Management of Aquifer Recharge for Sustainability: Proceedings of the 6th International Symposium on Managed Artificial Recharge of Groundwater, ISMAR6, Phoenix, Arizona USA October 28 - November 2, 2007, ISMAR Proceedings. Acacia Publishing Incorpo…
Barber et al.	2009	Spreading methods	Infiltration ponds & basins	MODFLOW	x					GM, RF	Optimization/Planning of System		USA	Barber, M.E., Hossain, A., Covert, J.J., Gregory, G.J., 2009. Augmentation of seasonal low stream flows by artificial recharge in the Spokane Valley-Rathdrum Prairie aquifer of Idaho and Washington, USA. Hydrogeology Journal 17, 1459–1470. doi:10.1007/s10040-009-0467-6
Barber et al.	2009	Well, shaft & borehole recharge	ASR/ ASTR	MODFLOW	x					F, RF	Optimization/Planning of System		USA	Barber, M.E., Hossain, A., Covert, J.J., Gregory, G.J., 2009. Augmentation of seasonal low stream flows by artificial recharge in the Spokane Valley-Rathdrum Prairie aquifer of Idaho and Washington, USA. Hydrogeology Journal 17, 1459–1470. doi:10.1007/s10040-009-0467-6
Bekele et al.	2006	Spreading methods	Reverse Drainage method	MODFLOW, MODPATH	x		x			GM	Optimization/Planning of System		Australia	Bekele, E.B., Toze, S., Rümmler, J., Hanna, J., Blair, P., Turner, N., 2006. Improvements in wastewater quality from soil and aquifer passage using infiltration galleries: case study in Western Australia, in: UNESCO (Ed.), Recharge Systems for Protecting and Enhancing Groundwater Resources - Proceedings of the 5th International Symposium on Management of Aquifer Recharge ISMAR5, Berlin, Germany, …
Bekele et al.	2011	Spreading methods	Reverse Drainage method	Visual AEM	x					D	Impact on Groundwater		Australia	Bekele, E., Patterson, B., Smith, A.J., 2011. Application of the Australian Guidelines for Water Recycling Phase 2 Managed Aquifer Recharge to Perry Lakes Example (Report to the Department of Water of Western Australia). CSIRO.
Bhola et al.	2014	In-channel modifications	Recharge dam	FEFLOW, MIKE-11, NAM	x	xx	x		xx	GM, SI	Impact on Groundwater		India	Bhola, P.K., Zabel, A.K., Rajaveni, S.P., Indu, S.N., Monninkhoff, B., Elango, L., 2014. Integrated surface water and groundwater modeling for optimizing MAR structures in the Chennai region.
Brandt	1998	Spreading methods	Infiltration ponds & basins	SHE	x					RE	Recovery efficiency		Denmark	Brandt, G., 1998. Arrenaes artificial recharge trial plant, Denmark- Hydrological and chemical aspects, in: International Symposium on Artificial Recharge of Ground Water, Peters, J.H. (Eds.), Artificial Recharge of Groundwater: Proceedings of the Third International Symposium on Artificial Recharge of Groundwater : TISAR 98, Amsterdam, Netherlands, 21-25 September 1998. A.A. Balkema, Rotterdam; …
Brown	2005	Well, shaft & borehole recharge	ASR/ ASTR	MODFLOW, SEAWAT, MT3DMS	xx		xx			F, RE, GM, SI	Recovery efficiency	Impact on Groundwater	USA	Brown, C.J., 2005. Planning Decision Framework for Brackish Water Aquifer, Storage and Recovery (ASR) Projects (Dissertation). University of Florida.
Brown	2007	Well, shaft & borehole recharge	ASR/ ASTR	stochastic analysis			x			GM	Impact on Groundwater		USA	Brown, C.J., 2007. A Stochastic Evaluation of the Subsidence Potential of the Hawthorn Group in South Florida as a Result of the CERP ASR System, in: Fox, P. (Ed.), Management of Aquifer Recharge for Sustainability: Proceedings of the 6th International Symposium on Managed Artificial Recharge of Groundwater, ISMAR6, Phoenix, Arizona USA October 28 - November 2, 2007, ISMAR Proceedings. Acacia Pub…
Brown and Misut	2010	Well, shaft & borehole recharge	ASR/ ASTR	PHAST	x		x	x		F, GP, RE	Geochemical Processes	Recovery Efficiency	USA	Brown, C.J., Misut, P.E., 2010. Aquifer geochemistry at potential aquifer storage and recovery sites in coastal plain aquifers in the New York city area, USA. Applied Geochemistry 25, 1431–1452. doi:10.1016/j.apgeochem.2010.07.001
Brown and Nevulis	2006	Well, shaft & borehole recharge	ASR/ ASTR	MODFLOW, MT3DMS	x		x			RE, GM	Recovery efficiency	Impact on Groundwater	USA	Brown, C.J., Nevulis, R., 2006. A model study of the proposed Everglades Restoration Hillsboro ASR Pilot Project, in: UNESCO (Ed.), Recharge Systems for Protecting and Enhancing Groundwater Resources - Proceedings of the 5th International Symposium on Management of Aquifer Recharge ISMAR5, Berlin, Germany, 11–16 June 2005, ISMAR Proceedings. pp. 73–78.
Browne et al.	2011	Spreading methods	Infiltration ponds & basins	2D variable saturated flow, clogging model	x	x	x			GP, C	Geochemical Processes		Australia	Browne, D., Deletic, A., Fletcher, T., Mudd, G., 2011. Modeling the development and consequences of clogging for stormwater infiltration trenches. Presented at the 12th International Conference on Urban Drainage, 11-16 September 2011, Porto Alegre, Brazil.
Brun et al.	1998	Well, shaft & borehole recharge	ASR/ ASTR	MIKE-SHE, CXTFIT, PHREEQC	x		x	x		GP, WQ	Geochemical Processes		Netherlands	Brun, A., Christensen, F.D., Chrsitiansen, J.S., Stuyfzand, P.J., Timmer, H., 1998. Water quality modelling at the Langerak deep-well recharge site, in: International Symposium on Artificial Recharge of Ground Water, Peters, J.H. (Eds.), Artificial Recharge of Groundwater: Proceedings of the Third International Symposium on Artificial Recharge of Groundwater : TISAR 98, Amsterdam, Netherlands, 21…
Charlesworth et al.	2002	In-channel modifications	Channel spreading	SUTRA	x		x			GM, SI	Impact on Groundwater		Australia	Charlesworth, P.B., Narayan, K.A., Bristow, K.L., Lowis, B., Laidlow, G., McGowan, R., 2002. The Burgekin Delta- Australia´s oldest artificial recharge scheme, in: Dillon, P. (Ed.), Management of Aquifer Recharge for Sustainability: Proceedings of the 4th International Symposium on Artificial Recharge of Groundwater. ISAR-4, Adelaide, South Australia, 22-26 September 2002, ISMAR Proceedings. A.A.…
Charlesworth et al.	2002	Well, shaft & borehole recharge	Dug well/ shaft/ pit injection	SUTRA	x		x			GM, SI	Impact on Groundwater		Australia	Charlesworth, P.B., Narayan, K.A., Bristow, K.L., Lowis, B., Laidlow, G., McGowan, R., 2002. The Burgekin Delta- Australia´s oldest artificial recharge scheme, in: Dillon, P. (Ed.), Management of Aquifer Recharge for Sustainability: Proceedings of the 4th International Symposium on Artificial Recharge of Groundwater. ISAR-4, Adelaide, South Australia, 22-26 September 2002, ISMAR Proceedings. A.A.…
Clark et al.	2015	Well, shaft & borehole recharge	ASR/ ASTR	WaterCress					x	D, O	Optimization/Planning of System		Australia	Clark, R., Gonzalez, D., Dillon, P., Charles, S., Cresswell, D., Naumann, B., 2015. Reliability of water supply from stormwater harvesting and managed aquifer recharge with a brackish aquifer in an urbanising catchment and changing climate. Environmental Modelling & Software 72, 117–125. doi:10.1016/j.envsoft.2015.07.009
de la Orden-Gómez and Murillo	2002	Spreading methods	Reverse Drainage method	MODFLOW	x					F, RE, SI	Optimization/Planning of System	Recovery Efficiency	Spain	de la Orden-Gómez, J.A., Murillo, K.A., 2002. Recharge enhancement to precent saltwater intrusion in coastal Spain, in: Dillon, P. (Ed.), Management of Aquifer Recharge for Sustainability: Proceedings of the 4th International Symposium on Artificial Recharge of Groundwater. ISAR-4, Adelaide, South Australia, 22-26 September 2002, ISMAR Proceedings. A.A. Balkema, Lisse; Exton, PA, pp. 353–356.
de la Orden-Gómez and Murillo	2002	Well, shaft & borehole recharge	ASR/ ASTR	MODFLOW	x					F, RE, SI	Optimization/Planning of System	Recovery Efficiency	Spain	de la Orden-Gómez, J.A., Murillo, K.A., 2002. Recharge enhancement to precent saltwater intrusion in coastal Spain, in: Dillon, P. (Ed.), Management of Aquifer Recharge for Sustainability: Proceedings of the 4th International Symposium on Artificial Recharge of Groundwater. ISAR-4, Adelaide, South Australia, 22-26 September 2002, ISMAR Proceedings. A.A. Balkema, Lisse; Exton, PA, pp. 353–356.
Descourvieres et al.	2012	Well, shaft & borehole recharge	ASR/ ASTR	PHREEQC				x		GP	Geochemical Processes		Australia	Descourvieres, C., Prommer, H., Hartog, N., Oldham, C., Greskowiak, J., Patterson, B., 2012. Identification of Geochemical Controls on Sediment Reactivity and Buffering Processes During Managed Aquifer Recharge in a Heterogeneous Aquifer: Laboratory Experiments and Inverse Kinetic Reaction Modelling, in: Draeger, M. (Ed.), Achieving Groundwater Supply Sustainability & Reliability through Managed …
Dillon et al.	2006	Well, shaft & borehole recharge	ASR/ ASTR	ASRRI, EASY-LEACHER, PHT3D			x			WQ, GP, RA, RT	Geochemical Processes		Australia	Dillon, P.J., Toze, S., Pavelic, P., Vanderzalm, J.L., Barry, K., Ying, G.-G., Kookana, R., Skjemstad, J., Nicholson, B., Miller, R., Correll, R., Prommer, H., Greskowiak, J., Stuyfzand, P.J., 2006b. Water quality improvements during aquifer storage and recovery at ten sites, in: UNESCO (Ed.), Recharge Systems for Protecting and Enhancing Groundwater Resources - Proceedings of the 5th Internation…
Dillon et al.	2006	Well, shaft & borehole recharge	ASR/ ASTR	analytical Nomogram			x			WQ, RA	Geochemical Processes		Indonesia	Dillon, P.J., Pavelic, P., Barry, K., Fildebrandt, S., Prawoto, N., 2006a. Nomogram to predict water quality improvement for managed recharge of aquifers, in: UNESCO (Ed.), Recharge Systems for Protecting and Enhancing Groundwater Resources - Proceedings of the 5th International Symposium on Management of Aquifer Recharge ISMAR5, Berlin, Germany, 11–16 June 2005, ISMAR Proceedings. pp. 477–484.
Dillon et al.	2010	Well, shaft & borehole recharge	ASR/ ASTR	FEFLOW, PHREEQC	x		x	x		GP, RE, SI, C	Recovery efficiency	Geochemical Processes	Australia	Dillon, P.J., Pavelic, P., Page, D., Miotlinski, K., Levett, K., Barry, K., Taylor, R., Wakelin, S., Vanderzalm, J.L., Molloy, R., Parsons, S., Dudding, M., Goode, A., 2010. Developing Aquifer Storage and Recovery (ASR) Opportunities in Melbourne – Rossdale ASR demonstration project final report.
Ebrahim	2013	Well, shaft & borehole recharge	ASR/ ASTR	MODFLOW	x					F	Optimization/Planning of System		Oman	Ebrahim, G.Y., 2013. Modelling Groundwater Systems Understanding And Iimproving Groundwater Quantity And Quality Management. UNESCO-IHE, Delft, Netherlands.
Ebrahim et al.	2015	Well, shaft & borehole recharge	ASR/ ASTR	MODFLOW	x					F	Optimization/Planning of System		Oman	Ebrahim, G.Y., Jonoski, A., Al-Maktoumi, A., Ahmed, M., Mynett, A., 2015. Simulation-Optimization Approach for Evaluating the Feasibility of Managed Aquifer Recharge in the Samail Lower Catchment, Oman. Journal of Water Resources Planning and Management 05015007. doi:10.1061/(ASCE)WR.1943-5452.0000588
Eckert et al.	2006	Induced bank filtration	Riverbank filtration	PHREEQC				x		WQ, GP	Geochemical Processes		Germany	Eckert, P., Rohns, H.P., Irmscher, R., 2006. Dynamic processes during bank filtration and their impact on raw water quality, in: UNESCO (Ed.), Recharge Systems for Protecting and Enhancing Groundwater Resources - Proceedings of the 5th International Symposium on Management of Aquifer Recharge ISMAR5, Berlin, Germany, 11–16 June 2005, ISMAR Proceedings. pp. 17–22.
Evans and Arunakumaren	2012	Spreading methods	Infiltration ponds & basins	MODFLOW, MODPATH, analytical solution of Saltwater intrusion (Glover), MT3DMS	xx		x			GM, SI	Impact on Groundwater		Australia	Evans, P., Arunakumaren, J., 2012. Groundwater Management in Bribie Island For Urban Expansion, in: Draeger, M. (Ed.), Achieving Groundwater Supply Sustainability & Reliability through Managed Aquifer Recharge - Proceedings of the Symosium ISMAR 7, 9-13 October 2009, Abu Dhabi, UAE. Abu Dhabi, UAE, pp. 381–388.
Fernández-Escalante	2013	Spreading methods	Infiltration ponds & basins	HELP		x				GM	Impact on Groundwater		Spain	Fernández-Escalante, A.E., 2013. Practical Criteria in the Design and Maintenance of MAR Facilities in Order to Minimise Clogging Impacts Obtained from Two Different Operative Sites in Spain, in: Martin, R. (Ed.), Clogging Issues Associated with Managed Aquifer Recharge Methods. IAH Commission on Managing Aquifer Recharge, Australia, pp. 119–154.
Fernández-Escalante	2013	Well, shaft & borehole recharge	ASR/ ASTR	HELP		x				GM	Impact on Groundwater		Spain	Fernández-Escalante, A.E., 2013. Practical Criteria in the Design and Maintenance of MAR Facilities in Order to Minimise Clogging Impacts Obtained from Two Different Operative Sites in Spain, in: Martin, R. (Ed.), Clogging Issues Associated with Managed Aquifer Recharge Methods. IAH Commission on Managing Aquifer Recharge, Australia, pp. 119–154.
Flint et al.	2002	Spreading methods	Infiltration ponds & basins	TOUGH2		x	x			D, RT, GM, WQ	Impact on Groundwater	Geochemical Processes	USA	Flint, A.L., 2002. The Role of Unsaturated Flow in Artificial Recharge Projects, in: Aiken, G.R., Kuniansky, E.L. (Eds.), U.S. Geological Survey Artificial Recharge Workshop Proceedings, April 2-4, 2002, Sacramento, California. U.S. Geological Survey, Sacramento, California.
Fritz et al.	2002	Induced bank filtration	Riverbank filtration	FEFLOW	x		x			RT, RE, C	Geochemical Processes	Recovery Efficiency	Germany	Fritz, B., Sievens, J., Eichhorn, S., Pekdeger, A., 2002. Geochemical and hydraulic investigations of river sediments in a bank filtration system, in: Dillon, P. (Ed.), Management of Aquifer Recharge for Sustainability: Proceedings of the 4th International Symposium on Artificial Recharge of Groundwater. ISAR-4, Adelaide, South Australia, 22-26 September 2002, ISMAR Proceedings. A.A. Balkema, Lis…
Gaus et al.	2007	Well, shaft & borehole recharge	Dug well/ shaft/ pit injection	MARTHE, PHREEQC	x	x	x	x		F, SAT, WQ, GP	Geochemical Processes	Optimization/Planning of System	Israel	Gaus, I., Cikurel, H., Aharoni, A., Guttman, Y., Azaroual, M., Kloppmann, W., 2007. ALTERNATIVE SAT OF SECONDARY EFFLUENTS USING A COMBINATION OF UF AND SHORT TERM SAT FOR INCREASING INFILTRATION RATES AT THE SHAFDAN SITE (ISRAEL), in: Fox, P. (Ed.), Management of Aquifer Recharge for Sustainability: Proceedings of the 6th International Symposium on Managed Artificial Recharge of Groundwater, ISM…
Gaus et al.	2002	Well, shaft & borehole recharge	ASR/ ASTR	PHREEQC, SWIFT	x		x	x		GP, WQ	Geochemical Processes		United Kingdom	Gaus, I., Shand, P., Gale, I.N., Williams, A.T., Eastwood, J.C., 2002. Geochemical modelling of fluoride concentration changes during Aquifer Storage and Recovery (ASR) in the Chalk aquifer in Wessex, England. Quarterly Journal of Engineering Geology and Hydrogeology 35, 203–208. doi:10.1144/1470-9236/2001-52
Gerrard	2002	Well, shaft & borehole recharge	Dug well/ shaft/ pit injection	PWBM (Pit Waterbalance model)					x	GM	Impact on Groundwater		Australia	Gerrard, J., 2002. Stormwater harvesting in open pit final voids in the Northern Goldfields of Western Australia, in: Dillon, P. (Ed.), Management of Aquifer Recharge for Sustainability: Proceedings of the 4th International Symposium on Artificial Recharge of Groundwater. ISAR-4, Adelaide, South Australia, 22-26 September 2002, ISMAR Proceedings. A.A. Balkema, Lisse; Exton, PA, pp. 425–430.
Glendenning and Vervoort	2011	Rainwater & runoff harvesting	Trenches	water balance model					x	GM	Impact on Groundwater		India	Glendenning, C.J., Vervoort, R.W., 2011. Hydrological impacts of rainwater harvesting (RWH) in a case study catchment: The Arvari River, Rajasthan, India Part 2. Catchment-scale impacts. Agricultural Water Management 98, 715–730. doi:10.1016/j.agwat.2010.11.010
Glendenning and Vervoort	2011	Rainwater & runoff harvesting	Barriers and Bunds	water balance model					x	GM	Impact on Groundwater		India	Glendenning, C.J., Vervoort, R.W., 2011. Hydrological impacts of rainwater harvesting (RWH) in a case study catchment: The Arvari River, Rajasthan, India Part 2. Catchment-scale impacts. Agricultural Water Management 98, 715–730. doi:10.1016/j.agwat.2010.11.010
Glushchenko et al.	2006	In-channel modifications	Channel spreading	hydrogeological model	x					RT,GM	Impact on Groundwater		Russia	Glushchenko, A., Michaelsen, O., Larsen, J.W., Vasin, S.A., Grünheid, S., Hart, S.D., Fritz, B., 2006. Kaliningrad Water Services Improvement Project – Baseline investigation for potential for reduction and stabilisation of organic matter, in: UNESCO (Ed.), Recharge Systems for Protecting and Enhancing Groundwater Resources - Proceedings of the 5th International Symposium on Management of Aquifer…
Gómez Gómez et al.	2006	Well, shaft & borehole recharge	ASR/ ASTR	AQUATOOL-SIMGES					x	GM	Impact on Groundwater		Spain	Gómez Gómez, J.D., Murillo Diaz, J.M., López Geta, J.A., Rodriguez Hermández, L., 2006. Analysis of feasibility and effects of artificial recharge in some aquifers. Modelling of integrated management in the Medio Vinalopó basin (Alicante, Spain), in: UNESCO (Ed.), Recharge Systems for Protecting and Enhancing Groundwater Resources - Proceedings of the 5th International Symposium on Management of …
Gore et al.	1998	In-channel modifications	Recharge dam	MODFLOW	x					GM	Impact on Groundwater		India	Gore, K.P., Pendke, M.S., Gurunadha Rao, V.V.S., Gupta, C.P., 1998. Groundwater modelling to quantify the effect of water harvesting structures in Wagarwadi watershed, Parbhani district, Maharashtra, India. Hydrological Processes 12, 1043–1052. doi:10.1002/(SICI)1099-1085(19980615)12:7<1043::AID-HYP638>3.0.CO;2-I
Gore et al.	2010	In-channel modifications	Recharge dam	MODFLOW	x					GM	Impact on Groundwater		India	Gore, K.P., Gurunadharao, V.V.S., Naik, B.S., Barman, D., 2010. Ground water recharge in Wagarwadi watershed through recharge process and ground water flow models. Presented at the XVIIth World Congress of the International Commission of Agricultural and Biosystems Engineering (CIGR), Quebec, Canada.
Gore et al.	2010	Spreading methods	Infiltration ponds & basins	MODFLOW	x					GM	Impact on Groundwater		India	Gore, K.P., Gurunadharao, V.V.S., Naik, B.S., Barman, D., 2010. Ground water recharge in Wagarwadi watershed through recharge process and ground water flow models. Presented at the XVIIth World Congress of the International Commission of Agricultural and Biosystems Engineering (CIGR), Quebec, Canada.
Goren	2008	Spreading methods	Infiltration ponds & basins	analytical and numerical transport (MATLAB)				xx		WQ, GP, SAT	Geochemical Processes		Israel	Goren, O., 2009. Geochemical Evolution and Manganese Mobilization in Organic Enriched Water Recharging Calcareous-sandstone Aquifier; Clues from the Shafdan Sewage Treatment Plant. Hebrew University, Jerusalem, Israel.
Goyal et al.	2009	Well, shaft & borehole recharge	ASR/ ASTR	HYDRUS 2D, Forchheimer analytical	xx					GM, SI	Impact on Groundwater		India	Goyal, V., Jhorar, B., Malik, R., Streck, T., others, 2009. Simulation of groundwater recharge from an aquifer storage recovery well under shallow water-table condition. Current science 96, 376.
Greskowiak et al.	2006	Spreading methods	Infiltration ponds & basins	MODFLOW, PHT3D	x		x	x		WQ	Geochemical Processes		Germany	Greskowiak, J., Prommer, H., Massmann, G., Nützmann, G., 2006a. Modeling Seasonal Redox Dynamics and the Corresponding Fate of the Pharmaceutical Residue Phenazone During Artificial Recharge of Groundwater. Environmental Science & Technology 40, 6615–6621. doi:10.1021/es052506t
Greskowiak et al.	2006	Well, shaft & borehole recharge	ASR/ ASTR	MODFLOW, MT3DMS, PHT3D	x		x	x		GP, WQ, C	Geochemical Processes		Australia	Greskowiak, J., Prommer, H., Vanderzalm, J., Pavelic, P., Dillon, P.J., 2006b. Quantifying biogeochemical changes during ASR of reclaimed water at Bolivar, South Australia, in: UNESCO (Ed.), Recharge Systems for Protecting and Enhancing Groundwater Resources - Proceedings of the 5th International Symposium on Management of Aquifer Recharge ISMAR5, Berlin, Germany, 11–16 June 2005, ISMAR Proceedin…
Greskowiak et al.	2007	Spreading methods	Infiltration ponds & basins	MODFLOW, PHT3D	x			x		GP, WQ	Geochemical Processes		Germany	Greskowiak, J., Prommer, H., Massmann, G., Nützmann, G., 2007. Modeling the redox-dependent fate of a pharmaceutically active compound during managed aquifer recharge, in: Fox, P. (Ed.), Management of Aquifer Recharge for Sustainability: Proceedings of the 6th International Symposium on Managed Artificial Recharge of Groundwater, ISMAR6, Phoenix, Arizona USA October 28 - November 2, 2007, ISMAR P…
Greskowiak et al.	2005	Well, shaft & borehole recharge	ASR/ ASTR	MODFLOW, MT3DMS, PHT3D	x		x	x		GP, WQ, C	Geochemical Processes		Australia	Greskowiak, J., Prommer, H., Vanderzalm, J., Pavelic, P., Dillon, P., 2005. Modeling of carbon cycling and biogeochemical changes during injection and recovery of reclaimed water at Bolivar, South Australia: MODELING CARBON CYCLING. Water Resources Research 41, n/a–n/a. doi:10.1029/2005WR004095
Griffioen et al.	1998	Well, shaft & borehole recharge	ASR/ ASTR	MODFLOW, MT3D96, MODBIO, PHREEQC	x			x		GP	Geochemical Processes		Theoretical analysis	Griffioen, J., Lorens, A.L., Venema, P., Stroet, C.B. te, Minnema, B., Laeven, M.P., Stuyfzand, P.J., van Beek, C.G.E.M., Beekman, W., 1998. An integrated model for predicting and assessing the development of groundwater quality, in: International Symposium on Artificial Recharge of Ground Water, Peters, J.H. (Eds.), Artificial Recharge of Groundwater: Proceedings of the Third International Sympo…
Grützmacher et al.	2006	Induced bank filtration	Riverbank filtration	Modflow-MT3DMS, CXTFIT	x		xx			GP, C	Geochemical Processes		Germany	Grützmacher, G., Bartel, H., Wiese, B., 2006. Simulating bank filtration and artificial recharge on a technical scale, in: UNESCO (Ed.), Recharge Systems for Protecting and Enhancing Groundwater Resources - Proceedings of the 5th International Symposium on Management of Aquifer Recharge ISMAR5, Berlin, Germany, 11–16 June 2005, ISMAR Proceedings. pp. 498–503.
Grützmacher et al.	2006	Spreading methods	Infiltration ponds & basins	Modflow-MT3DMS, CXTFIT	x		xx			GP, C	Geochemical Processes		Germany	Grützmacher, G., Bartel, H., Wiese, B., 2006. Simulating bank filtration and artificial recharge on a technical scale, in: UNESCO (Ed.), Recharge Systems for Protecting and Enhancing Groundwater Resources - Proceedings of the 5th International Symposium on Management of Aquifer Recharge ISMAR5, Berlin, Germany, 11–16 June 2005, ISMAR Proceedings. pp. 498–503.
Guo et al.	2012	Well, shaft & borehole recharge	ASR/ ASTR	SEAWAT	x		x			RE	Recovery efficiency		Theoretical Analysis	Guo, W., Maliva, R.G., Missimer, T.M., 2012. Recovery Efficiency Assessment of an ASR Well Using Groundwater Models, in: Draeger, M. (Ed.), Achieving Groundwater Supply Sustainability & Reliability through Managed Aquifer Recharge - Proceedings of the Symosium ISMAR 7, 9-13 October 2009, Abu Dhabi, UAE. Abu Dhabi, UAE, pp. 414–421.
Guo et al.	2015	Well, shaft & borehole recharge	ASR/ ASTR	SEAWAT, ECLIPSE	xx		xx			RE	Recovery efficiency		Theoretical analysis	Guo, W., Coulibaly, K., Maliva, R.G., 2015. Simulated effects of aquifer heterogeneity on ASR system performance. Environmental Earth Sciences 73, 7803–7809. doi:10.1007/s12665-014-3822-4
Gutiérrez-Ojeda et al.	2006	Well, shaft & borehole recharge	ASR/ ASTR	PHREEQC				x		GP, WQ, C	Geochemical Processes		Mexico	Gutiérrez-Ojeda, C., Cardona, A., Martínez-Morales, M., Aparicio-Mijares, F., 2006. Geochemical evaluation of artificial recharge to intermediate flow systems in a carbonate aquifer from northeast Mexico, in: UNESCO (Ed.), Recharge Systems for Protecting and Enhancing Groundwater Resources - Proceedings of the 5th International Symposium on Management of Aquifer Recharge ISMAR5, Berlin, Germany, …
Gutiérrez-Ojeda et al.	2007	Well, shaft & borehole recharge	Dug well/ shaft/ pit injection	MODFLOW	x					GM	Impact on Groundwater		Mexico	Gutiérrez-Ojeda, C., Martínez-Morales, M., Ortiz-Flores, G., 2007. Artificial recharge of groundwater in a coal mining area of northeast Mexico, in: Fox, P. (Ed.), Management of Aquifer Recharge for Sustainability: Proceedings of the 6th International Symposium on Managed Artificial Recharge of Groundwater, ISMAR6, Phoenix, Arizona USA October 28 - November 2, 2007, ISMAR Proceedings. Acacia Publ…
Gvirtzman et al.	2008	Spreading methods	Infiltration ponds & basins	CPFLOW (2D)	x	x				O	Optimization/Planning of System		Israel	Gvirtzman, H., Shalev, E., Dahan, O., Hatzor, Y.H., 2008. Large-scale infiltration experiments into unsaturated stratified loess sediments: Monitoring and modeling. Journal of Hydrology 349, 214–229. doi:10.1016/j.jhydrol.2007.11.002
Händel et al.	2014	Well, shaft & borehole recharge	ASR/ ASTR	HYDRUS 2D/3D, COMSOL		xx				F	Optimization/Planning of System		Theoretical Analysis	Händel, F., Liu, G., Dietrich, P., Liedl, R., Butler, J.J., 2014. Numerical assessment of ASR recharge using small-diameter wells and surface basins. Journal of Hydrology 517, 54–63. doi:10.1016/j.jhydrol.2014.05.003
Hasan et al.	2013	Spreading methods	Infiltration ponds & basins	PCSiWaPro		x	x			WQ, SAT	Geochemical Processes		Laboratory experiment	Hasan, I., Sallway, J., Sandhu, C., Fichtner, T., Graeber, P.-W., 2013. Simulation of water and solute transport in unsaturated soils by taking the example of decentralised treated wastewater infiltration. Presented at the AquaConSoil, Barcelona.
Hashemi et al.	2015	Spreading methods	Infiltration ponds & basins	MODFLOW, conceptual water balance model	x				x	F, GM	Impact on Groundwater		Iran	Hashemi, H., Berndtsson, R., Persson, M., 2015. Artificial recharge by floodwater spreading estimated by water balances and groundwater modelling in arid Iran. Hydrological Sciences Journal 60, 336–350. doi:10.1080/02626667.2014.881485
Hashemi et al.	2013	Spreading methods	Flooding	MODFLOW	x					GM	Impact on Groundwater		Iran	Hashemi, H., Berndtsson, R., Kompani-Zare, M., Persson, M., 2013. Natural vs. artificial groundwater recharge, quantification through inverse modeling. Hydrology and Earth System Sciences 17, 637–650. doi:10.5194/hess-17-637-2013
Heilweil et al.	2015	Spreading methods	Ditch and furrow	VS2DI		x				F, O	Optimization/Planning of System		USA	Heilweil, V.M., Benoit, J., Healy, R.W., 2015. Variably saturated groundwater modelling for optimizing managed aquifer recharge using trench infiltration: VARIABLY SATURATED MODELLING FOR OPTIMIZING TRENCH INFILTRATION. Hydrological Processes 29, 3010–3019. doi:10.1002/hyp.10413
Henzler et al.	2014	Induced bank filtration	Riverbank filtration	MODFLOW, MT3DMS	x		x	x		WQ	Geochemical Processes		Germany	Henzler, A.F., Greskowiak, J., Massmann, G., 2014. Modeling the fate of organic micropollutants during river bank filtration (Berlin, Germany). Journal of Contaminant Hydrology 156, 78–92. doi:10.1016/j.jconhyd.2013.10.005
Herrmann	2006	Well, shaft & borehole recharge	ASR/ ASTR	ECLIPSE	x					O, SI	Optimization/Planning of System		Theoretical Analysis	Herrmann, R., 2006. ASR well field optimization in unconfined aquifers in the Middle East, in: UNESCO (Ed.), Recharge Systems for Protecting and Enhancing Groundwater Resources - Proceedings of the 5th International Symposium on Management of Aquifer Recharge ISMAR5, Berlin, Germany, 11–16 June 2005, ISMAR Proceedings. pp. 109–114.
Holländer et al.	2007	Well, shaft & borehole recharge	ASR/ ASTR	MODFLOW	x					GM, D, RE	Impact on Groundwater	Recovery Efficiency	India	Holländer, H.M., Mull, R., Panda, S.N., 2007. A cocnept of managed aquifer recharge using ASR-wells for sustainable use of groundwater resources in an alluvial coastal aquifer in eastern India, in: Fox, P. (Ed.), Management of Aquifer Recharge for Sustainability: Proceedings of the 6th International Symposium on Managed Artificial Recharge of Groundwater, ISMAR6, Phoenix, Arizona USA October 28 -…
Holländer et al.	2009	Well, shaft & borehole recharge	ASR/ ASTR	MODFLOW	x					GM, D, RE	Impact on groundwater	Planning/Optimisation of System	India	Holländer, H.M., Mull, R., Panda, S.N., 2009. A concept for managed aquifer recharge using ASR-wells for sustainable use of groundwater resources in an alluvial coastal aquifer in Eastern India. Physics and Chemistry of the Earth, Parts A/B/C 34, 270–278. doi:10.1016/j.pce.2008.05.001
Holzbecher et al.	2008	Induced bank filtration	Riverbank filtration	NASRI Bank Filtration Simulator	x					F, D, O	Optimization/planning of system		Theoretical analysis	Holzbecher, E., Grützmacher, G., Amy, G., Wiese, B., Sharma, S.K., 2008. The Bank Filtration Simulator – a MATLAB GUI, in: Möller, A., Page, B., Schreiber, M., International Conference on Informatics for Environmental Protection, Universität Lüneburg (Eds.), Environmental Informatics and Industrial Ecology: 22nd International Conference on Informatics for Environmental Protection ; Enviroinfo 200…
Horner et al.	2006	Induced bank filtration	Riverbank filtration	PHREEQC				x		GP	Geochemical Processes		Laboratory experiment	Horner, C., Holzbecher, E., Nützmann, G., 2006. A coupled transport and reaction model for long column experiments simulating bank filtration, in: UNESCO (Ed.), Recharge Systems for Protecting and Enhancing Groundwater Resources - Proceedings of the 5th International Symposium on Management of Aquifer Recharge ISMAR5, Berlin, Germany, 11–16 June 2005, ISMAR Proceedings. pp. 384–387.
Hu et al.	2015	Spreading methods	Flooding	PHREEQC-2				x		WQ, SAT	Geochemical Processes		China	Hu, H., Mao, X., Barry, D.A., Liu, C., Li, P., 2015. Modeling reactive transport of reclaimed water through large soil columns with different low-permeability layers. Hydrogeology Journal 23, 351–364. doi:10.1007/s10040-014-1187-0
Hutchinson	1998	Well, shaft & borehole recharge	ASR/ ASTR	CFEST	x		x			RE	Recovery efficiency		USA	Hutchinson, A.S., 1998. The San Gabriel Valley Receycled Water Demonstration Project, in: International Symposium on Artificial Recharge of Ground Water, Peters, J.H. (Eds.), Artificial Recharge of Groundwater: Proceedings of the Third International Symposium on Artificial Recharge of Groundwater : TISAR 98, Amsterdam, Netherlands, 21-25 September 1998. A.A. Balkema, Rotterdam; Brookfield, pp. 81…
Izbicki et al.	2010	Well, shaft & borehole recharge	ASR/ ASTR	MODFLOW, MODPATH	x					GP, RT	Geochemical Processes		USA	Izbicki, J.A., Petersen, C.E., Glotzbach, K.J., Metzger, L.F., Christensen, A.H., Smith, G.A., O’Leary, D., Fram, M.S., Joseph, T., Shannon, H., 2010. Aquifer Storage Recovery (ASR) of chlorinated municipal drinking water in a confined aquifer. Applied Geochemistry 25, 1133–1152. doi:10.1016/j.apgeochem.2010.04.017
Jensen et al.	2006	Spreading methods	Infiltration ponds & basins	PHREEQC				x		GP	Geochemical Processes		Denmark	Jensen, T.Ø., Berg, R.L., Bennedsen, L., Brandt, G., Spliid, H., 2006. Geochemical and microbial processes in the unsaturated zone at the Arrenæs artificial recharge trial plant, in: UNESCO (Ed.), Recharge Systems for Protecting and Enhancing Groundwater Resources - Proceedings of the 5th International Symposium on Management of Aquifer Recharge ISMAR5, Berlin, Germany, 11–16 June 2005, ISMAR Pro…
Jha and Pfeiffer	2006	In-channel modifications	Subsurface dam	2D FEM model	x					D	Optimization/Planning of System		Japan	Jha, M.K., Pfeiffer, O., 2006. Simulation modeling of salient artificial recharge techniques for sustainable groundwater management, in: UNESCO (Ed.), Recharge Systems for Protecting and Enhancing Groundwater Resources - Proceedings of the 5th International Symposium on Management of Aquifer Recharge ISMAR5, Berlin, Germany, 11–16 June 2005, ISMAR Proceedings. pp. 388–394.
Jha and Pfeiffer	2006	In-channel modifications	Recharge dam	2D FEM model	x					D	Optimization/Planning of System		Japan	Jha, M.K., Pfeiffer, O., 2006. Simulation modeling of salient artificial recharge techniques for sustainable groundwater management, in: UNESCO (Ed.), Recharge Systems for Protecting and Enhancing Groundwater Resources - Proceedings of the 5th International Symposium on Management of Aquifer Recharge ISMAR5, Berlin, Germany, 11–16 June 2005, ISMAR Proceedings. pp. 388–394.
Jorgensen and Helleberg	2002	Spreading methods	Excess Irrigation	MODFLOW	x					GM	Impact on Groundwater		Denmark	Jorgensen, N.O., Helleberg, B.B., 2002. Stable isotopes (2H and 18O) and chloride as environmental tracers in a study of artificial recharge in Denmark, in: Dillon, P. (Ed.), Management of Aquifer Recharge for Sustainability: Proceedings of the 4th International Symposium on Artificial Recharge of Groundwater. ISAR-4, Adelaide, South Australia, 22-26 September 2002, ISMAR Proceedings. A.A. Balkem…
Jorgensen and Helleberg	2002	Spreading methods	Infiltration ponds & basins	MODFLOW	x					GM	Impact on Groundwater		Denmark	Jorgensen, N.O., Helleberg, B.B., 2002. Stable isotopes (2H and 18O) and chloride as environmental tracers in a study of artificial recharge in Denmark, in: Dillon, P. (Ed.), Management of Aquifer Recharge for Sustainability: Proceedings of the 4th International Symposium on Artificial Recharge of Groundwater. ISAR-4, Adelaide, South Australia, 22-26 September 2002, ISMAR Proceedings. A.A. Balkem…
Karimov et al.	2012	Well, shaft & borehole recharge	ASR/ ASTR	MODFLOW	x					F	Impact on Groundwater		Uzbekistan	Karimov, A., Mavlonov, A., Miryusupov, F., Gracheva, I., Borisov, V., Abdurahmonov, B., 2012b. Modelling policy alternatives toward managed aquifer recharge in the Fergana Valley, Central Asia. Water International 37, 380–394. doi:10.1080/02508060.2012.706432
Karimov et al.	2012	Well, shaft & borehole recharge	ASR/ ASTR	MODFLOW	x					F	Impact on Groundwater		Uzbekistan	Karimov, A., Gracheva, I., Miryusupov, F., 2012a. Modeling the Managed Aquifer Recharge for Groundwater Salinity Management in the Sokh River Basin, in: Draeger, M. (Ed.), Achieving Groundwater Supply Sustainability & Reliability through Managed Aquifer Recharge - Proceedings of the Symosium ISMAR 7, 9-13 October 2009, Abu Dhabi, UAE. Abu Dhabi, UAE, pp. 203–211.
Karimov et al.	2010	In-channel modifications	Channel spreading	MODFLOW	x					F	Impact on Groundwater		Uzbekistan	Karimov, A., Smakhtin, V., Mavlonov, A., Gracheva, I., 2010. Water “banking” in Fergana valley aquifers—A solution to water allocation in the Syrdarya river basin? Agricultural Water Management 97, 1461–1468. doi:10.1016/j.agwat.2010.04.011
Kloppmann et al.	2012	Spreading methods	Infiltration ponds & basins	MARTHE (1D unsaturated), 3D groundwater flow (MOCDENS3D), 2D reactive transport model	x	x		x		WQ, SAT	Geochemical Processes	Optimization/Planning of System	Belgium	Kloppmann, W., Aharoni, A., Chikurel, H., Dillon, P., Gaus, I., Guttman, J., Kaitzer, T., Kremer, S., Masciopinto, C., Miotliński, K., Pavelic, P., Pettenati, M., Picot-Colbeaux, G., 2012. Use of groundwater models for prediction and optimisation of the behaviour of MAR sites, in: Kazner, C., Wintgens, T., Dillon, P. (Eds.), Water Reclamation Technologies for Safe Managed Aquifer Recharge. IWA Pu…
Kloppmann et al.	2012	Spreading methods	Infiltration ponds & basins	MARTHE 3D, MARTHE 2D , PHREEQC	x	xx		x		GP, SAT	Geochemical Processes		Israel	Kloppmann, W., Aharoni, A., Chikurel, H., Dillon, P., Gaus, I., Guttman, J., Kaitzer, T., Kremer, S., Masciopinto, C., Miotliński, K., Pavelic, P., Pettenati, M., Picot-Colbeaux, G., 2012. Use of groundwater models for prediction and optimisation of the behaviour of MAR sites, in: Kazner, C., Wintgens, T., Dillon, P. (Eds.), Water Reclamation Technologies for Safe Managed Aquifer Recharge. IWA Pu…
Kloppmann et al.	2012	Well, shaft & borehole recharge	Dug well/ shaft/ pit injection	groundwater flow, transport	x		x			RT, RA, O	Geochemical Processes	Optimization/Planning of System	Italy	Kloppmann, W., Aharoni, A., Chikurel, H., Dillon, P., Gaus, I., Guttman, J., Kaitzer, T., Kremer, S., Masciopinto, C., Miotliński, K., Pavelic, P., Pettenati, M., Picot-Colbeaux, G., 2012. Use of groundwater models for prediction and optimisation of the behaviour of MAR sites, in: Kazner, C., Wintgens, T., Dillon, P. (Eds.), Water Reclamation Technologies for Safe Managed Aquifer Recharge. IWA Pu…
Knapton et al.	2004	Spreading methods	Infiltration ponds & basins	numerical gw flow model, particle tracking	x					F, SAT, WQ, GM	Impact on Groundwater		Australia	Knapton, A., Jolly, P., Pavelic, P., Dillon, P., Barry, K., Mucha, M., Gates, W., 2004. Feasibility of a pilot 600ML/yr soil aquifer treatment plant at the Arid Zone Research Institute : a report / prepared by DIPE and CSIRO for the Power & Water Corporation.
Kohlfahl et al.	2002	Well, shaft & borehole recharge	Dug well/ shaft/ pit injection	MODFLOW	x					GP	Geochemical Processes	Recovery Efficiency	Germany	Kohlfahl, C., Harmann, E., Pekdeger, A., 2002. Modelling of artificial water oscillations in a flooded lignite mine, in: Dillon, P. (Ed.), Management of Aquifer Recharge for Sustainability: Proceedings of the 4th International Symposium on Artificial Recharge of Groundwater. ISAR-4, Adelaide, South Australia, 22-26 September 2002, ISMAR Proceedings. A.A. Balkema, Lisse; Exton, PA, pp. 261–264.
Konikow et al.	2001	Well, shaft & borehole recharge	ASR/ ASTR	SUTRA	x		x			RE, SI	Recovery efficiency	Optimization/Planning of System	USA	Konikow, L.F., August, L.L., Voss, C.I., 2001. Effects of Clay Dispersion on Aquifer Storage and Recovery in Coastal Aquifers. Transport in Porous Media 43, 45–64. doi:10.1023/A:1010613525547
Kremer et al.	2008	Well, shaft & borehole recharge	ASR/ ASTR	FEFLOW	x		x			RE, SI	Recovery efficiency		Australia	Kremer, S., Pavelic, P., Dillon, P., Barry, K., 2008. Flow and Solute Transport Observations and Modelling from the First Phase of Flushing Operations at the Salisbury ASTR Site, Water for a Healthy Country Flagship Report.
Kremer et al.	2010	Well, shaft & borehole recharge	ASR/ ASTR	FEFLOW	x		x			RE	Recovery efficiency		Australia	Kremer, S., Barry, K., Levett, K., Miotliński, K., Dillon, P., 2010. Revised Flow and Solute Transport Modelling for ASTR Operations, South Australia, Water for a Healthy Country Flagship Report series.
Kupfersberger	2012	Spreading methods	Infiltration ponds & basins	numerical gw flow model, particle tracking	x					O	Optimization/Planning of System		Austria	Kupfersberger, H., 2012. Managed aquifer recharge in Austria as central element of integrated water resources management, in: Draeger, M. (Ed.), Achieving Groundwater Supply Sustainability & Reliability through Managed Aquifer Recharge - Proceedings of the Symosium ISMAR 7, 9-13 October 2009, Abu Dhabi, UAE. Abu Dhabi, UAE, pp. 243–250.
Lacher et al.	2014	Spreading methods	Infiltration ponds & basins	MODFLOW	x					GM, RF	Impact on Groundwater		USA	Lacher, L., Turner, D., Gungle, B., Bushman, B., Richter, H., 2014. Application of Hydrologic Tools and Monitoring to Support Managed Aquifer Recharge Decision Making in the Upper San Pedro River, Arizona, USA. Water 6, 3495–3527. doi:10.3390/w6113495
Landini et al.	2006	Well, shaft & borehole recharge	ASR/ ASTR	physical model	x					F, GM	Impact on Groundwater		Italy	Landini, F., Pranzini, G., Scardazzi, M.E., 2006. Evaluation of the strategies for the re-equilibrium of the groundwater balance of an overexploited aquifer (Prato, Italy), in: UNESCO (Ed.), Recharge Systems for Protecting and Enhancing Groundwater Resources - Proceedings of the 5th International Symposium on Management of Aquifer Recharge ISMAR5, Berlin, Germany, 11–16 June 2005, ISMAR Proceedin…
Legg and Sagstad	2002	Spreading methods	Infiltration ponds & basins	MODFLOW	x					F, O	Impact on Groundwater	Optimization/Planning of System	USA	Legg, C., Sagstad, S., 2002. Optimization and use of various recharge techniques for reclaimed wastewater at a sensitive site in Glendale, Arizona, in: Dillon, P. (Ed.), Management of Aquifer Recharge for Sustainability: Proceedings of the 4th International Symposium on Artificial Recharge of Groundwater. ISAR-4, Adelaide, South Australia, 22-26 September 2002, ISMAR Proceedings. A.A. Balkema, Li…
Legg and Sagstad	2002	Well, shaft & borehole recharge	ASR/ ASTR	MODFLOW	x					F, O	Impact on Groundwater	Optimization/Planning of System	USA	Legg, C., Sagstad, S., 2002. Optimization and use of various recharge techniques for reclaimed wastewater at a sensitive site in Glendale, Arizona, in: Dillon, P. (Ed.), Management of Aquifer Recharge for Sustainability: Proceedings of the 4th International Symposium on Artificial Recharge of Groundwater. ISAR-4, Adelaide, South Australia, 22-26 September 2002, ISMAR Proceedings. A.A. Balkema, Li…
Levannier	2012	Well, shaft & borehole recharge	ASR/ ASTR	ECLIPSE	x		x			GM	Impact on Groundwater		Theoretical Analysis	Levannier, A., 2012. Modeling of wellbore effects in Managed Aquifer Recharge monitoring, in: Draeger, M. (Ed.), Achieving Groundwater Supply Sustainability & Reliability through Managed Aquifer Recharge - Proceedings of the Symosium ISMAR 7, 9-13 October 2009, Abu Dhabi, UAE. Abu Dhabi, UAE, pp. 85–92.
Licht et al.	2006	Induced bank filtration	Riverbank filtration	CXTFIT			x			WQ, GP	Geochemical Processes		Laboratory experiment	Licht, E., Herberer, T., Wiese, B., Grützmacher, G., 2006. Estimating of the solute transport parameters retardation factor and decay coefficient of pharmaceutical residues using the program visual CXTFIT, in: UNESCO (Ed.), Recharge Systems for Protecting and Enhancing Groundwater Resources - Proceedings of the 5th International Symposium on Management of Aquifer Recharge ISMAR5, Berlin, Germany,…
Lowry and Anderson	2006	Well, shaft & borehole recharge	ASR/ ASTR	MODFLOW, MODPATH, MT3DMS	x		x			RE	Recovery efficiency		USA	Lowry, C.S., Anderson, M.P., 2006. An Assessment of Aquifer Storage Recovery Using Ground Water Flow Models. Ground Water 44, 661–667. doi:10.1111/j.1745-6584.2006.00237.x
Lu et al.	2011	Well, shaft & borehole recharge	ASR/ ASTR	MATLAB built-in partial differential and ordinary differential equations			x			RE	Recovery efficiency		Theoretical Analysis	Lu, C., Du, P., Chen, Y., Luo, J., 2011. Recovery efficiency of aquifer storage and recovery (ASR) with mass transfer limitation: RE OF ASR WITH MASS TRANSFER. Water Resources Research 47, n/a–n/a. doi:10.1029/2011WR010605
Lundh et al.	2006	Spreading methods	Infiltration ponds & basins	MIKE-SHE	x					GM, RT	Impact on Groundwater		Sweden	Lundh, M., Jonasson, S.A., Jorgensen, N.O., Johnson, M.D., 2006. Hydrogeology and water treatment performance of the Dösebacka artificial recharge plant – the basis for an efficient system for early warning, in: UNESCO (Ed.), Recharge Systems for Protecting and Enhancing Groundwater Resources - Proceedings of the 5th International Symposium on Management of Aquifer Recharge ISMAR5, Berlin, German…
Majumdar et al.	2008	Well, shaft & borehole recharge	ASR/ ASTR	MODFLOW + filtration	x					GP, C	Geochemical Processes		India	Majumdar, P.K., Sekhar, M., Sridharan, K., Mishra, G.C., 2008. Numerical Simulation of Groundwater Flow with Gradually Increasing Heterogeneity due to Clogging. Journal of Irrigation and Drainage Engineering 134, 400–404. doi:10.1061/(ASCE)0733-9437(2008)134:3(400)
Maliva et al.	2006	Well, shaft & borehole recharge	ASR/ ASTR	SEAWAT	x		x			RE, SI	Recovery efficiency		Theoretical Analysis	Maliva, R.G., Guo, W., Missimer, T.M., 2006. Aquifer Storage and Recovery: Recent Hydrogeological Advances and System Performance. Water Environment Research 78, 2428–2435. doi:10.2175/106143006X123102
Marston and Heilweil	2012	In-channel modifications	Recharge dam	MODFLOW	x					GM	Impact on Groundwater		USA	Marston, T.M., Heilweil, V.M., 2012. Numerical Simulation of Groundwater Movement and Managed Aquifer Recharge from Sand Hollow Reservoir, Hurricane Bench area, Washington County, Utah (No. 2012–5236), USGS Scientific Investigations Report.
Martin et al.	2012	Well, shaft & borehole recharge	ASR/ ASTR	MODFLOW	x					GM	Impact on Groundwater		Australia	Martin, R., Barnett, B., Pitman, C., Kaufmann, C., Swiatnik, A., Burgess, C., 2012. Modelling the regional impacts of multiple MAR schemes on the Northern Adelaide Plains, in: Draeger, M. (Ed.), Achieving Groundwater Supply Sustainability & Reliability through Managed Aquifer Recharge - Proceedings of the Symosium ISMAR 7, 9-13 October 2009, Abu Dhabi, UAE. Abu Dhabi, UAE, pp. 389–397.
Masciopinto	2013	Well, shaft & borehole recharge	ASR/ ASTR	fracture flow, physical clogging	x		x			D, SI, C	Optimization/Planning of System		Lebanon	Masciopinto, C., 2013. Management of aquifer recharge in Lebanon by removing seawater intrusion from coastal aquifers. Journal of Environmental Management 130, 306–312. doi:10.1016/j.jenvman.2013.08.021
Masciopinto et al.	2008	Well, shaft & borehole recharge	Dug well/ shaft/ pit injection	2D fracture flow, FD transport	x		x			GP, WQ, RA	Geochemical Processes		Italy	Masciopinto, C., La Mantia, R., Chrysikopoulos, C.V., 2008. Fate and transport of pathogens in a fractured aquifer in the Salento area, Italy: FATE AND TRANSPORT OF ACQUIFER PATHOGENS. Water Resources Research 44, n/a–n/a. doi:10.1029/2006WR005643
McMahon et al.	2000	Spreading methods	Ditch and furrow	MODFLOW + SPLASH	x	x				GM, O	Impact on Groundwater	Optimization/Planning of System	Australia	McMahon, G.A., Arunakumaren, N.J., Bajracharya, K., 2000. Hydrogeological Conceptualisation of the Burdekin River Delta. Presented at the Hydro 2000, Bern.
Merritt	1985	Well, shaft & borehole recharge	ASR/ ASTR	INTERA	x		x			RE, SI	Recovery efficiency		USA	Merritt, M.L., 1985. Subsurface storage of freshwater in south Florida: A digital model analysis of recoverability.
Merritt	1986	Well, shaft & borehole recharge	ASR/ ASTR	INTERA	x					RE	Recovery efficiency		USA	Merritt, M.L., 1986. Recovering Fresh Water Stored in Saline Limestone Aquifers. Ground Water 24, 516–529. doi:10.1111/j.1745-6584.1986.tb01031.x
Merritt et al.	1997	Well, shaft & borehole recharge	ASR/ ASTR	SWIP	x		x			RE, SI	Recovery efficiency		USA	Merritt, M.L., South Florida Water Management District (Fla.), Miami-Dade Water and Sewer Authority Department (Fla.), 1997. Tests of subsurface storage of freshwater at Hialeah, Dade County, Florida, and numerical simulation of the salinity of recovered water. U.S. G.P.O. ; U.S. Geological Survey, Branch of Information Services, [Washington]; Denver, CO.
Miller and Correll	2002	Well, shaft & borehole recharge	ASR/ ASTR	ASRRI			x			F	Geochemical Processes		Theoretical analysis	Miller, R., Correll, R., 2002. ASRRI: a predictive index of contaminant attenuation during aquifer storage and recovery, in: Dillon, P. (Ed.), Management of Aquifer Recharge for Sustainability: Proceedings of the 4th International Symposium on Artificial Recharge of Groundwater. ISAR-4, Adelaide, South Australia, 22-26 September 2002. A.A. Balkema, Lisse; Exton, PA, pp. 69–74.
Minsley et al.	2011	Well, shaft & borehole recharge	ASR/ ASTR	COMSOL	x		x			F, D	Optimization/Planning of System		Kuwait	Minsley, B.J., Ajo-Franklin, J., Mukhopadhyay, A., Morgan, F.D., 2011. Hydrogeophysical Methods for Analyzing Aquifer Storage and Recovery Systems. Ground Water 49, 250–269. doi:10.1111/j.1745-6584.2010.00676.x
Miotlinski et al.	2014	Well, shaft & borehole recharge	ASR/ ASTR	FEFLOW	x		x			RE, RT, SI	Recovery efficiency		Australia	Miotliński, K., Dillon, P.J., Pavelic, P., Barry, K., Kremer, S., 2014. Recovery of Injected Freshwater from a Brackish Aquifer with a Multiwell System. Groundwater 52, 495–502. doi:10.1111/gwat.12089
Mirecki	2006	Well, shaft & borehole recharge	ASR/ ASTR	PHREEQC				x		GP, WQ	Geochemical Processes		USA	Mirecki, J.E., 2006a. Geochemical Models of Water-Quality Changes During Aquifer Storage Recovery (ASR) Cycle Tests, Phase 1: Geochemical Models Using Existing Data. DTIC Document.
Mirecki	2006	Well, shaft & borehole recharge	ASR/ ASTR	PHREEQC				x		GP, WQ	Geochemical Processes		USA	Mirecki, J.E., 2006b. Arsenic mobilization and sequestration during successive aquifer storage recovery (ASR) cycle tests in the carbonate Upper Floridan aquifer, South Florida, in: UNESCO (Ed.), Recharge Systems for Protecting and Enhancing Groundwater Resources - Proceedings of the 5th International Symposium on Management of Aquifer Recharge ISMAR5, Berlin, Germany, 11–16 June 2005, ISMAR Proc…
Mirlas et al.	2015	Spreading methods	Infiltration ponds & basins	Modflow	x					GM	Impact on Groundwater		Kasachstan	Mirlas, V., Antonenko, V., Kulagin, V., Kuldeeva, E., 2015. Assessing artificial groundwater recharge on irrigated land using the MODFLOW model. Earth Science Research 4. doi:10.5539/esr.v4n2p16
Missimer et al.	2015	Well, shaft & borehole recharge	ASR/ ASTR	MODFLOW	x					F	Optimization/Planning of System		Saudi Arabia	Missimer, T.M., Guo, W., Maliva, R.G., Rosas, J., Jadoon, K.Z., 2015. Enhancement of wadi recharge using dams coupled with aquifer storage and recovery wells. Environmental Earth Sciences 73, 7723–7731. doi:10.1007/s12665-014-3410-7
Misut and Voss	2007	Well, shaft & borehole recharge	ASR/ ASTR	SUTRA	x		x			F, GM, SI	Impact on Groundwater	Optimization/Planning of System	USA	Misut, P.E., Voss, C.I., 2007. Freshwater–saltwater transition zone movement during aquifer storage and recovery cycles in Brooklyn and Queens, New York City, USA. Journal of Hydrology 337, 87–103. doi:10.1016/j.jhydrol.2007.01.035
Monninkhoff and Kaden	2012	In-channel modifications	Recharge dam	FEFLOW, MIKE-SHE, SIWA, WBalMo, Mike-11	xx	xx	x		xxx	GM, SI, O	Impact on Groundwater		China	Monninkhoff, L., Kaden, S., 2012. Managed Aquifer Recharge through a penetrated river bed in Shandong, China, in: Draeger, M. (Ed.), Achieving Groundwater Supply Sustainability & Reliability through Managed Aquifer Recharge - Proceedings of the Symosium ISMAR 7, 9-13 October 2009, Abu Dhabi, UAE. Abu Dhabi, UAE, pp. 267–274.
Monninkhoff and Kaden	2012	In-channel modifications	Subsurface dam	FEFLOW, MIKE-SHE, SIWA, WBalMo, Mike-11	xx	xx	x		xxx	GM, SI, O	Impact on Groundwater		China	Monninkhoff, L., Kaden, S., 2012. Managed Aquifer Recharge through a penetrated river bed in Shandong, China, in: Draeger, M. (Ed.), Achieving Groundwater Supply Sustainability & Reliability through Managed Aquifer Recharge - Proceedings of the Symosium ISMAR 7, 9-13 October 2009, Abu Dhabi, UAE. Abu Dhabi, UAE, pp. 267–274.
Monninkhoff and Kaden	2012	Well, shaft & borehole recharge	Dug well/ shaft/ pit injection	FEFLOW, MIKE-SHE, SIWA, WBalMo, Mike-11	xx	xx	x		xxx	GM, SI, O	Impact on Groundwater		China	Monninkhoff, L., Kaden, S., 2012. Managed Aquifer Recharge through a penetrated river bed in Shandong, China, in: Draeger, M. (Ed.), Achieving Groundwater Supply Sustainability & Reliability through Managed Aquifer Recharge - Proceedings of the Symosium ISMAR 7, 9-13 October 2009, Abu Dhabi, UAE. Abu Dhabi, UAE, pp. 267–274.
Moorman et al.	2002	Well, shaft & borehole recharge	ASR/ ASTR	MODFLOW	x					GM	Impact on Groundwater		Netherlands	Moorman, J.H.N., Colin, M.G., Stuyfzand, P.J., 2002. Iron precipitation clogging of recovery well following nearby deep well injection, in: Dillon, P. (Ed.), Management of Aquifer Recharge for Sustainability: Proceedings of the 4th International Symposium on Artificial Recharge of Groundwater. ISAR-4, Adelaide, South Australia, 22-26 September 2002, ISMAR Proceedings. A.A. Balkema, Lisse; Exton, …
Mosch	1998	Well, shaft & borehole recharge	ASR/ ASTR	reservoir					x	O	Optimization/Planning of System		Netherlands	Mosch, M.J.M., 1998. Dynamic simulation model for water management of large-scale artificial recharge system, in: International Symposium on Artificial Recharge of Ground Water, Peters, J.H. (Eds.), Artificial Recharge of Groundwater: Proceedings of the Third International Symposium on Artificial Recharge of Groundwater : TISAR 98, Amsterdam, Netherlands, 21-25 September 1998. A.A. Balkema, Rotte…
Myers et al.	2013	Well, shaft & borehole recharge	ASR/ ASTR	PCSWMM			x		x	GM, RA	Impact on Groundwater		Australia	Myers, B., Pezzaniti, D., Gonzalez, D., 2013. Hydrological modelling of the Parafield and Cobbler Creek catchment for hazard analysis planning (No. 13/3), Goyder Institute for Water Research Technical Report Series.
Namjou and Pattle	2002	Spreading methods	Flooding	MODFLOW	x					F	Impact on Groundwater		New Zealand	Namjou, P., Pattle, A.D., 2002. Hydrogeological feasibility of disposal of treated effluent in coastal dunes near Auckland, New Zealand, in: Dillon, P. (Ed.), Management of Aquifer Recharge for Sustainability: Proceedings of the 4th International Symposium on Artificial Recharge of Groundwater. ISAR-4, Adelaide, South Australia, 22-26 September 2002, ISMAR Proceedings. A.A. Balkema, Lisse; Exton,…
Narayan et al.	2007	Spreading methods	Infiltration ponds & basins	SUTRA	x		x			GM, SI	Impact on Groundwater		Australia	Narayan, K.A., Schleeberger, C., Bristow, K.L., 2007. Modelling seawater intrusion in the Burdekin Delta Irrigation Area, North Queensland, Australia. Agricultural Water Management 89, 217–228. doi:10.1016/j.agwat.2007.01.008
Neumann et al.	2006	In-channel modifications	Recharge dam	MODFLOW, analytical spreadsheet model	xx					RE	Recovery efficiency		India	Neumann, I., Barker, J., Macdonald, D., Gale, I., 2006. Approximating technical effectiveness of low technology aquifer recharge structures using simple numerical solutions, in: UNESCO (Ed.), Recharge Systems for Protecting and Enhancing Groundwater Resources - Proceedings of the 5th International Symposium on Management of Aquifer Recharge ISMAR5, Berlin, Germany, 11–16 June 2005, ISMAR Proceedi…
Nham et al.	2015	Spreading methods	Infiltration ponds & basins	MODFLOW, MT3DMS (reactive)	x		x	x		WQ, SAT	Geochemical Processes		Greece	Nham, H.T.T., Greskowiak, J., Nödler, K., Rahman, M.A., Spachos, T., Rusteberg, B., Massmann, G., Sauter, M., Licha, T., 2015. Modeling the transport behavior of 16 emerging organic contaminants during soil aquifer treatment. Science of The Total Environment 514, 450–458. doi:10.1016/j.scitotenv.2015.01.096
Niazi et al.	2014	Well, shaft & borehole recharge	ASR/ ASTR	MODFLOW, VENSIM	xx				x	F, GM	Optimization/Planning of System	Impact on Groundwater	Iran	Niazi, A., Prasher, S., Adamowski, J., Gleeson, T., 2014. A System Dynamics Model to Conserve Arid Region Water Resources through Aquifer Storage and Recovery in Conjunction with a Dam. Water 6, 2300–2321. doi:10.3390/w6082300
Nishikawa et al.	2003	Spreading methods	Infiltration ponds & basins	MODFLOW-96, MOC3D	x		x			GM, GP, WQ	Impact on Groundwater	Geochemical Processes	USA	Nishikawa, T., Densmore, J.N., Martin, P., Matti, J., 2003. Evaluation of the Source and Transport of High Nitrate Concentrations in Ground Water, Warren Subbasin, California (No. 03–4009), Water Resources Investigations Report. U. S. Geological Survey, Sacramento, California.
Nützmann et al.	2006	Induced bank filtration	Riverbank filtration	CXTFIT			x			GP	Geochemical Processes		Laboratory experiment	Nützmann, G., Holzbecher, E., Strahl, G., Wiese, B., Licht, E., Grützmacher, G., 2006. Visual CXTFIT – a user-friendly simulation tool for modelling one-dimensional transport, sorption and degradation processes during bank filtration, in: UNESCO (Ed.), Recharge Systems for Protecting and Enhancing Groundwater Resources - Proceedings of the 5th International Symposium on Management of Aquifer Rech…
Page et al.	2007	Well, shaft & borehole recharge	ASR/ ASTR	qualitative risk assessment			x			GP, WQ, RA	Geochemical Processes		Australia	Page, D., Barry, K., Chassagne, A., Pavelic, P., Dillon, P., Purdie, M., Pittman, C., Rinck-Pfeiffer, S., Regel, R., 2007. Application of the Hazard Analysis and Critical Control Point (HACCP) risk management framework to managed aquifer recharge, in: Fox, P. (Ed.), Management of Aquifer Recharge for Sustainability: Proceedings of the 6th International Symposium on Managed Artificial Recharge of …
Page et al.	2009	Well, shaft & borehole recharge	ASR/ ASTR	PHREEQC				x		WQ, GP, RA	Geochemical Processes		Australia	Page, D., Vanderzalm, J., Barry, K., Levett, K., Kremer, S., Ayuso-Gabella, M.N., Dillon, P., Toze, S., Sidhu, J., Shackleton, M., others, 2009. Operational residual risk assessment for the Salisbury stormwater ASTR project. Water for a Healthy Country National Research Flagship, CSIRO.
Page et al.	2014	Well, shaft & borehole recharge	ASR/ ASTR	PHREEQC				x		GP, C	Geochemical Processes	Recovery Efficiency	Australia	Page, D., Vanderzalm, J., Miotliński, K., Barry, K., Dillon, P., Lawrie, K., Brodie, R.S., 2014. Determining treatment requirements for turbid river water to avoid clogging of aquifer storage and recovery wells in siliceous alluvium. Water Research 66, 99–110. doi:10.1016/j.watres.2014.08.018
Palma et al.	2015	Spreading methods	Infiltration ponds & basins	CEQUEAU, MOTRIT, WEAP21, PHREEQC	x			x	xx	O	Optimization/Planning of System		Mexico	Palma, A., González, F., Cruickshank, C., 2015. Managed Aquifer Recharge As a Key Element in Sonora River Basin Management, Mexico. Journal of Hydrologic Engineering 20, B4014004. doi:10.1061/(ASCE)HE.1943-5584.0001114
Park et al.	2006	Spreading methods	Infiltration ponds & basins	FEMWATER, VS2DI	xx		x			F, GM	Impact on Groundwater	Optimization/Planning of System	USA	Park, H., Cha, D.-H., Fox, P., 2006. Uncertainty Analysis of Mound Monitoring for Recharged Water from Surface Spreading Basins. Journal of Environmental Engineering 132, 1572–1579. doi:10.1061/(ASCE)0733-9372(2006)132:12(1572)
Parkhust et al.	2002	Well, shaft & borehole recharge	ASR/ ASTR	PHAST, PHREEQC	x	x	x			GP	Geochemical Processes		USA	Parkhust, D.L., 2002. Geochemical Modeling of an Aquifer Storage Recovery Experiment, Charleston, South Carolina, in: Aiken, G.R., Kuniansky, E.L. (Eds.), U.S. Geological Survey Artificial Recharge Workshop Proceedings, April 2-4, 2002, Sacramento, California. U.S. Geological Survey, Sacramento, California, pp. 38–41.
Parsons and Hatton	2012	Well, shaft & borehole recharge	ASR/ ASTR	2D analytical flow (Zhan&Zlotnik 2002)	x					F, GM, RE, RT	Impact on Groundwater	Recovery Efficiency	Australia	Parsons, S., Hatton, B., 2012. Significance of Natural and Induced Vertical Leakage for an MAR Scheme:Geelong, Australia, in: Draeger, M. (Ed.), Achieving Groundwater Supply Sustainability & Reliability through Managed Aquifer Recharge - Proceedings of the Symosium ISMAR 7, 9-13 October 2009, Abu Dhabi, UAE. Abu Dhabi, UAE, pp. 350–358.
Pauw et al.	2015	Spreading methods	Ditch and furrow	SEAWAT	x		x			GM, SI	Impact on Groundwater		Netherlands	Pauw, P.S., van Baaren, E.S., Visser, M., de Louw, P.G.B., Essink, G.H.P.O., 2015. Increasing a freshwater lens below a creek ridge using a controlled artificial recharge and drainage system: a case study in the Netherlands. Hydrogeology Journal 23, 1415–1430. doi:10.1007/s10040-015-1264-z
Pavelic and Dillon	2002	Well, shaft & borehole recharge	ASR/ ASTR	FEFLOW	x		x			RE	Recovery efficiency		Theoretical analysis	Pavelic, P., Dillon, P.J., 2002. Lumped parameter estimation of initial recovery efficiency during aquifer storage and recovery, in: Management of Aquifer Recharge for Sustainability. pp. 285–290.
Pavelic et al.	2004	Well, shaft & borehole recharge	ASR/ ASTR	FEFLOW, semi-analytical	xx		x			GM, RT, D, RE, SI	Optimization/Planning of System		Australia	Pavelic, P., Dillon, P.J., Robinson, N., 2004. Groundwater modelling to assist well-field design and operation for the ASTR Trial at Salisbury, South Australia. Citeseer.
Pavelic et al.	2006	Well, shaft & borehole recharge	ASR/ ASTR	FEFLOW, semi-analytical	xx					GM, RT, D, RE, SI	Optimization/Planning of System		Australia	Pavelic, P., Dillon, P.J., Robinson, N., 2006. Modelling of well-field design and operation for an Aquifer Storage Transfer and Recovery (ASTR) trial, in: UNESCO (Ed.), Recharge Systems for Protecting and Enhancing Groundwater Resources - Proceedings of the 5th International Symposium on Management of Aquifer Recharge ISMAR5, Berlin, Germany, 11–16 June 2005, ISMAR Proceedings. pp. 133–138.
Pérez-Patricio	2001	Spreading methods	Infiltration ponds & basins	CLOG	x		x			GP, C	Geochemical Processes		Laboratory experiment	Pérez-Patricio, A., 2001. Integrated Modeling of Clogging Processes in Artificial Groundwater Recharge (PhD). Technical University of Catalonia, Barcelona.
Pérez-Patricio	2001	Well, shaft & borehole recharge	ASR/ ASTR	CLOG	x		x			GP, C	Geochemical Processes		Denmark	Pérez-Patricio, A., 2001. Integrated Modeling of Clogging Processes in Artificial Groundwater Recharge (PhD). Technical University of Catalonia, Barcelona.
Pérez-Patricio	2001	Well, shaft & borehole recharge	ASR/ ASTR	CLOG	x		x			GP, C	Geochemical Processes		Laboratory experiment	Pérez-Patricio, A., 2001. Integrated Modeling of Clogging Processes in Artificial Groundwater Recharge (PhD). Technical University of Catalonia, Barcelona.
Pérez-Patricio and Carrera	1998	Well, shaft & borehole recharge	ASR/ ASTR	CLOG	x			x		GP, C	Geochemical Processes		Theoretical analysis	Pérez-Patricio, A., Carrera, J., 1998. A conceptual and numerical model to characterize clogging, in: International Symposium on Artificial Recharge of Ground Water, Peters, J.H. (Eds.), Artificial Recharge of Groundwater: Proceedings of the Third International Symposium on Artificial Recharge of Groundwater : TISAR 98, Amsterdam, Netherlands, 21-25 September 1998. A.A. Balkema, Rotterdam; Brookf…
Perrin et al.	2012	Rainwater & runoff harvesting	Trenches	rainfall-runoff model					x	GM, O	Impact on Groundwater	Optimization/Planning of System	India	Perrin, J., Massuel, S., Ahmed, S., 2012. Contribution of percolation tanks to total aquifer recharge: the example of Gajwel watershed, southern India, in: Draeger, M. (Ed.), Achieving Groundwater Supply Sustainability & Reliability through Managed Aquifer Recharge - Proceedings of the Symosium ISMAR 7, 9-13 October 2009, Abu Dhabi, UAE. Abu Dhabi, UAE, pp. 251–258.
Petkewich et al.	2004	Well, shaft & borehole recharge	ASR/ ASTR	PHAST	x		x	x		GP, RE, SI	Geochemical Processes		USA	Petkewich, M.D., Parkhurst, D.L., Conlon, K.J., Campbell, B.G., Mirecki, J.E., 2004. Hydrologic and Geochemical Evaluation of Aquifer Storage Recovery in the Santee Limestone/Black Mingo Aquifer, Charleston, South Carolina, 1998-2002, USGS SIR 2004-5046.
Pettenati et al.	2014	Spreading methods	Infiltration ponds & basins	MARTHE, PHREEQC				x		GP, GM, WQ	Geochemical Processes	Impact on Groundwater	India	Pettenati, M., Picot-Colbeaux, G., Thiéry, D., Boisson, A., Alazard, M., Perrin, J., Dewandel, B., Maréchal, J.C., Ahmed, S., Kloppmann, W., 2014. Water Quality Evolution During Managed Aquifer Recharge (MAR) in Indian Crystalline Basement Aquifers: Reactive Transport Modeling in the Critical Zone. Procedia Earth and Planetary Science 10, 82–87. doi:10.1016/j.proeps.2014.08.016
Phillips et al.	2002	Well, shaft & borehole recharge	ASR/ ASTR	MODFLOW	x					O	Optimization/Planning of System		USA	Phillips, S.P., Carlson, C.S., Metzger, L.F., Sneed, M., Galloway, D.I., Hudnut, K.W., Ikehara, M.E., 2002. Optimal management of an ASR program to control land subsidence in Lancaster, California, in: Dillon, P. (Ed.), Management of Aquifer Recharge for Sustainability: Proceedings of the 4th International Symposium on Artificial Recharge of Groundwater. ISAR-4, Adelaide, South Australia, 22-26 S…
Phipps et al.	2007	Spreading methods	Infiltration ponds & basins	simple mathematical model			x			C, GP	Geochemical Processes		USA	Phipps, D.W., Lyon, S., Hutchinson, A.S., 2007. Development of a percolation decay model to guide future optimization of surface water recharge basins, in: Fox, P. (Ed.), Management of Aquifer Recharge for Sustainability: Proceedings of the 6th International Symposium on Managed Artificial Recharge of Groundwater, ISMAR6, Phoenix, Arizona USA October 28 - November 2, 2007, ISMAR Proceedings. Acac…
Pipe-Martin	2006	Spreading methods	Infiltration ponds & basins	MODFLOW	x					GM, SI	Impact on Groundwater		Australia	Pipe-Martin, C., 2006. Protecting an island aquifer by using recycled water as a hydraulic barrier – a case study of Bribie Island, in: UNESCO (Ed.), Recharge Systems for Protecting and Enhancing Groundwater Resources - Proceedings of the 5th International Symposium on Management of Aquifer Recharge ISMAR5, Berlin, Germany, 11–16 June 2005, ISMAR Proceedings. pp. 856–861.
Prommer and Stuyfzand	2005	Well, shaft & borehole recharge	ASR/ ASTR	PHT3D	x		x	x		GP, WQ, RT	Geochemical Processes		Netherlands	Prommer, H., Stuyfzand, P.J., 2005. Identification of Temperature-Dependent Water Quality Changes during a Deep Well Injection Experiment in a Pyritic Aquifer. Environmental Science & Technology 39, 2200–2209. doi:10.1021/es0486768
Prommer and Stuyfzand	2006	Well, shaft & borehole recharge	ASR/ ASTR	PHT3D				x		GP, WQ, RT	Geochemical Processes		Netherlands	Prommer, H., Stuyfzand, P.J., 2006. On the use of reactive multicomponent transport modelling for assessing water quality changes during managed aquifer recharge, in: UNESCO (Ed.), Recharge Systems for Protecting and Enhancing Groundwater Resources - Proceedings of the 5th International Symposium on Management of Aquifer Recharge ISMAR5, Berlin, Germany, 11–16 June 2005, ISMAR Proceedings. pp. 41…
Prommer et al.	2013	Well, shaft & borehole recharge	ASR/ ASTR	MODFLOW, MT3DMS, PHT3D	x		x	x		GP, WQ, C	Geochemical Processes		Australia	Prommer, H., Descourvieres, C.D., Handyside, M., Hohnston, K., Harris, B., Li, Q., Phang, H., Costello, P., Seibert, S., Martin, M., 2013. Final report –Aquifer storage and recovery of potable water in the Leederville Aquifer. CSIRO: Water for a Healthy Country National Research Flagship, Australia.
Pyne	2005	Well, shaft & borehole recharge	ASR/ ASTR	MODFLOW, ASR Water Supply System	x				x	O	Optimization/Planning of System		USA	Pyne, R.D.G., 2005. Aquifer storage recovery: a guide to groundwater recharge through wells. ASR Systems, Gainesville, Florida.
Pyne	2005	Well, shaft & borehole recharge	ASR/ ASTR	CFEST	x					F, GM	Impact on Groundwater		USA	Pyne, R.D.G., 2005. Aquifer storage recovery: a guide to groundwater recharge through wells. ASR Systems, Gainesville, Florida.
Pyne	2005	Well, shaft & borehole recharge	ASR/ ASTR	MODFLOW	x		x			O	Optimization/Planning of System	Recovery Efficiency	USA	Pyne, R.D.G., 2005. Aquifer storage recovery: a guide to groundwater recharge through wells. ASR Systems, Gainesville, Florida.
Pyne	2005	Well, shaft & borehole recharge	ASR/ ASTR	SEAWAT	x					RE	Optimization/Planning of System		USA	Pyne, R.D.G., 2005. Aquifer storage recovery: a guide to groundwater recharge through wells. ASR Systems, Gainesville, Florida.
Pyne	2005	Well, shaft & borehole recharge	ASR/ ASTR	PHREEQC	x		x			GP, WQ	Recovery efficiency		USA	Pyne, R.D.G., 2005. Aquifer storage recovery: a guide to groundwater recharge through wells. ASR Systems, Gainesville, Florida.
Pyne	2005	Well, shaft & borehole recharge	ASR/ ASTR	HST3D				x		F, RE, SI	Geochemical Processes		USA	Pyne, R.D.G., 2005. Aquifer storage recovery: a guide to groundwater recharge through wells. ASR Systems, Gainesville, Florida.
Quinones-Aponte and Wexler	1995	Well, shaft & borehole recharge	ASR/ ASTR	SUTRA	x		x			RE, SI	Recovery efficiency		USA	Quinones-Aponte, V., Wexler, E.J., 1995. Preliminary assessment of injection, storage, and recovery of freshwater in the lower hawthorn aquifer, Cape Coral, Florida. US Department of the Interior, US Geological Survey.
Rahman et al.	2012	Spreading methods	Infiltration ponds & basins	MODFLOW, STANMOD (CXTFIT)	x		x			WQ, SAT	Geochemical Processes		Greece	Rahman, M.A., Ptak, T., Nödler, K., Licha, T., Dimitriadis, K., Soupilas, A., Sauter, M., 2012. Influence of aquifer properties on water quality changes during infiltration of treated effluent, in: Draeger, M. (Ed.), Achieving Groundwater Supply Sustainability & Reliability through Managed Aquifer Recharge - Proceedings of the Symosium ISMAR 7, 9-13 October 2009, Abu Dhabi, UAE. Abu Dhabi, UAE, p…
Rahman et al.	2013	Spreading methods	Infiltration ponds & basins	MODFLOW, MT3DMS (non-reactive)	x		x			F	Optimization/Planning of System		Palestine	Rahman, M.A., Rusteberg, B., Uddin, M.S., Lutz, A., Saada, M.A., Sauter, M., 2013. An integrated study of spatial multicriteria analysis and mathematical modelling for managed aquifer recharge site suitability mapping and site ranking at Northern Gaza coastal aquifer. Journal of Environmental Management 124, 25–39. doi:10.1016/j.jenvman.2013.03.023
Rastogi and Pandey	2002	Spreading methods	Infiltration ponds & basins	groundwater flow model (FE model)	x					GM	Impact on Groundwater		Theoretical analysis	Rastogi, A.K., Pandey, P.J., 2002. Influence of artificial recharge basin shapes on the mound underneath in phreatic aquifers, in: Dillon, P. (Ed.), Management of Aquifer Recharge for Sustainability: Proceedings of the 4th International Symposium on Artificial Recharge of Groundwater. ISAR-4, Adelaide, South Australia, 22-26 September 2002, ISMAR Proceedings. A.A. Balkema, Lisse; Exton, PA, pp. 2…
Ray and Prommer	2006	Induced bank filtration	Riverbank filtration	MODFLOW, PHT3D	x		x	x		GP, C	Geochemical Processes		USA	Ray, C., Prommer, H., 2006. Clogging-Induced Flow and Chemical Transport Simulation in Riverbank Filtration Systems, in: Hubbs, S. (Ed.), Riverbank Filtration Hydrology, Nato Science Series: IV: Earth and Environmental Sciences. Springer Netherlands, pp. 155–177.
Riches et al.	2007	Well, shaft & borehole recharge	ASR/ ASTR	PHREEQC, EQ3/6 (version 7.2c)				x		GP, WQ	Geochemical Processes		United Kingdom	Riches, J., Batey, J., Jones, M., Butcher, A.S., Newell, A.J., Gale, I.N., 2007. HYDROGEOCHEMISTRY OF AQUIFER STORAGE AND RECOVERY IN THE LOWER GREENSAND (LONDON, UK) FOR SEASONAL AND DROUGHT PUBLIC SUPPLY, in: Fox, P. (Ed.), Management of Aquifer Recharge for Sustainability: Proceedings of the 6th International Symposium on Managed Artificial Recharge of Groundwater, ISMAR6, Phoenix, Arizona USA…
Rinck-Pfeiffer et al.	2013	Well, shaft & borehole recharge	ASR/ ASTR	FEFLOW	x					GP, C	Geochemical Processes		Laboratory experiment	Rinck-Pfeiffer, S., Dillon, P., Ragusa, S., Hutson, J., Fallowfield, H., de Marsily, G., Pavelic, P., 2013. Reclaimed Water for Aquifer Storage and Recovery: A Column Study of Well Clogging, in: Martin, R. (Ed.), Clogging Issues Associated with Managed Aquifer Recharge Methods. IAH Commission on Managing Aquifer Recharge, Australia, pp. 26–33.
Rowland	2015	Well, shaft & borehole recharge	Dug well/ shaft/ pit injection	FEFLOW	x					O, GM, SI	Optimization/Planning of System	Impact on Groundwater	Australia	Rowland, F., 2015. Increase in Abstraction and Reinjection at the Cloudbreak Mine (Environmental Review).
Russo et al.	2015	Spreading methods	Infiltration ponds & basins	MODFLOW-2005 + FarmProcess	x					F, SI	Optimization/Planning of System		USA	Russo, T.A., Fisher, A.T., Lockwood, B.S., 2015. Assessment of Managed Aquifer Recharge Site Suitability Using a GIS and Modeling. Groundwater 53, 389–400. doi:10.1111/gwat.12213
Saaltink et al.	1998	Well, shaft & borehole recharge	ASR/ ASTR	RETRASO				x		GP, WQ	Geochemical Processes		Netherlands	Saaltink, M.W., Ayora, C., Stuyfzand, P.J., Timmer, H., 1998. Modelling the effects of deep artificial recharge on groundwater quality, in: International Symposium on Artificial Recharge of Ground Water, Peters, J.H. (Eds.), Artificial Recharge of Groundwater: Proceedings of the Third International Symposium on Artificial Recharge of Groundwater : TISAR 98, Amsterdam, Netherlands, 21-25 September…
Saharawat et al.	2006	Well, shaft & borehole recharge	ASR/ ASTR	HYDRUS 2D		x				GM	Impact on Groundwater		India	Saharawat, Y., Malik, R., Jhorar, B., Chaudhary, N., Ingwersen, J., Streck, T., 2006. Simulating effect of successive cycles in aquifer storage and recovery well in India, in: UNESCO (Ed.), Recharge Systems for Protecting and Enhancing Groundwater Resources - Proceedings of the 5th International Symposium on Management of Aquifer Recharge ISMAR5, Berlin, Germany, 11–16 June 2005, ISMAR Proceeding…
Samma et al.	2012	In-channel modifications	Recharge dam	MODFLOW	x					GM	Impact on Groundwater		Namibia	Samma, D., Xu, Y., Christelis, G., Church, J., 2012. Optimisation of water release from a dam to recharge a downstream unconfined alluvial aquifer, in: Draeger, M. (Ed.), Achieving Groundwater Supply Sustainability & Reliability through Managed Aquifer Recharge - Proceedings of the Symosium ISMAR 7, 9-13 October 2009, Abu Dhabi, UAE. Abu Dhabi, UAE, pp. 78–84.
Sayit and Yazicigil	2012	In-channel modifications	Subsurface dam	SEEP/W (2D)	x					GM, D	Optimization/Planning of System	Impact on Groundwater	Turkey	Sayit, A.P., Yazicigil, H., 2012. Assessment of artificial aquifer recharge potential in the Kucuk Menderes River Basin, Turkey. Hydrogeology Journal 20, 755–766. doi:10.1007/s10040-012-0850-6
Sayit and Yazicigil	2012	Spreading methods	Infiltration ponds & basins	SEEP/W (2D)	x					GM, D	Optimization/Planning of System	Impact on Groundwater	Turkey	Sayit, A.P., Yazicigil, H., 2012. Assessment of artificial aquifer recharge potential in the Kucuk Menderes River Basin, Turkey. Hydrogeology Journal 20, 755–766. doi:10.1007/s10040-012-0850-6
Schafer	2006	Induced bank filtration	Riverbank filtration	MODFLOW	x					RE	Recovery efficiency		USA	Schafer, C., 2006. Use of aquifer testing and groundwater modeling to evaluate aquifer/river hydraulics at Louisville Water Company, Lousville, Kentucky, USA, in: Hubbs, S. (Ed.), Riverbank Filtration Hydrology, Nato Science Series: IV: Earth and Environmental Sciences. Springer Netherlands, pp. 179–198.
Sedighi et al.	2006	Well, shaft & borehole recharge	ASR/ ASTR	MODFLOW, SARSM, MT3DMS	x		xx			RE	Recovery efficiency		USA	Sedighi, A., Klammler, H., Brown, C., Hatfield, K., 2006. A semi-analytical model for predicting water quality from an aquifer storage and recovery system. Journal of Hydrology 329, 403–412. doi:10.1016/j.jhydrol.2006.02.035
Sharma et al.	2012	Induced bank filtration	Riverbank filtration	MODFLOW, NASRI Bank Filtration Simulator	xx					F, WQ, GM	Geochemical Processes	Impact on Groundwater	Kenya	Sharma, S.K., Chaweza, D., Bosuben, N., Holzbecher, E., Amy, G., 2012. Framework for Feasibility Assessment and Performance Analysis of Riverbank Filtration Systems for Water Treatment, in: Draeger, M. (Ed.), Achieving Groundwater Supply Sustainability & Reliability through Managed Aquifer Recharge - Proceedings of the Symosium ISMAR 7, 9-13 October 2009, Abu Dhabi, UAE. Abu Dhabi, UAE, pp. 398–4…
Sharma et al.	2012	Induced bank filtration	Riverbank filtration	MODFLOW, NASRI Bank Filtration Simulator	xx					F, WQ, GM	Geochemical Processes	Impact on Groundwater	Malawi	Sharma, S.K., Chaweza, D., Bosuben, N., Holzbecher, E., Amy, G., 2012. Framework for Feasibility Assessment and Performance Analysis of Riverbank Filtration Systems for Water Treatment, in: Draeger, M. (Ed.), Achieving Groundwater Supply Sustainability & Reliability through Managed Aquifer Recharge - Proceedings of the Symosium ISMAR 7, 9-13 October 2009, Abu Dhabi, UAE. Abu Dhabi, UAE, pp. 398–4…
Sheng	2005	Well, shaft & borehole recharge	ASR/ ASTR	MODFLOW	x					GM	Impact on Groundwater		USA	Sheng, Z., 2005. An aquifer storage and recovery system with reclaimed wastewater to preserve native groundwater resources in El Paso, Texas. Journal of Environmental Management 75, 367–377. doi:10.1016/j.jenvman.2004.10.007
Shinde et al.	2006	Spreading methods	Ditch and furrow	field and trench water balance model					x	GM, O	Impact on Groundwater	Optimization/Planning of System	India	Shinde, M., Smout, I., Gorantiwar, S., 2006. Assessment of water harvesting and groundwater recharge through continuous contour trenches, in: UNESCO (Ed.), Recharge Systems for Protecting and Enhancing Groundwater Resources - Proceedings of the 5th International Symposium on Management of Aquifer Recharge ISMAR5, Berlin, Germany, 11–16 June 2005, ISMAR Proceedings. pp. 229–235.
Smith and Pollock	2012	Spreading methods	Infiltration ponds & basins	Glove Recharge Basin Model and ArcGIS					x	F	Optimization/Planning of System		Australia	Smith, A.J., Pollock, D.W., 2012. Assessment of Managed Aquifer Recharge Potential Using Ensembles of Local Models. Ground Water 50, 133–143. doi:10.1111/j.1745-6584.2011.00808.x
Stefan et al.	2012	Well, shaft & borehole recharge	ASR/ ASTR	KOSIM 7.3, MODFLOW	x				x	F	Optimization/Planning of System		Vietnam	Stefan, C., Fröhlich, T., Fuchs, L., Junghanns, R., Phan, H.M., Tran, V.N., Werner, P., 2012. Sustainable water resources management in the Long Bien district of Hanoi, Vietnam. Water Science & Technology: Water Supply 12, 737. doi:10.2166/ws.2012.049
Stefanescu and Dassargues	1996	Well, shaft & borehole recharge	ASR/ ASTR	MODFLOW	x					GM	Impact on Groundwater		Romania	Stefanescu, C., Dassargues, A., 1996. Simulation Of Pumping And Artificial Recharge In A Phreatic Aquifer Near Bucharest, Romania. Hydrogeology Journal 4, 72–83. doi:10.1007/s100400050095
Streetly	1998	Well, shaft & borehole recharge	ASR/ ASTR	SWIFT III	x		x			RE	Recovery efficiency		Theoretical analysis	Streetly, M.J., 1998. The use of modelling to predict the behaviour of ASR systems, in: International Symposium on Artificial Recharge of Ground Water, Peters, J.H. (Eds.), Artificial Recharge of Groundwater: Proceedings of the Third International Symposium on Artificial Recharge of Groundwater : TISAR 98, Amsterdam, Netherlands, 21-25 September 1998. A.A. Balkema, Rotterdam; Brookfield, pp. 263–…
Stuyfzand	1998	Spreading methods	Infiltration ponds & basins	EASY-LEACHER, INFOMI				x		WQ, GP	Geochemical Processes		Netherlands	Stuyfzand, P.J., 1998. Simple models for reactive transport of pollutants and main constituents during artificial recharge and bank filtration, in: International Symposium on Artificial Recharge of Ground Water, Peters, J.H. (Eds.), Artificial Recharge of Groundwater: Proceedings of the Third International Symposium on Artificial Recharge of Groundwater : TISAR 98, Amsterdam, Netherlands, 21-25 S…
Stuyfzand	2002	Spreading methods	Infiltration ponds & basins	EASY-LEACHER				x		GP, C	Geochemical Processes		Netherlands	Stuyfzand, P.J., 2002. Modelling the accumulation rate and chemical composition of clogging sludge layers in recharge basins with Easy-Leacher 4.6, in: Dillon, P. (Ed.), Management of Aquifer Recharge for Sustainability: Proceedings of the 4th International Symposium on Artificial Recharge of Groundwater. ISAR-4, Adelaide, South Australia, 22-26 September 2002, ISMAR Proceedings. A.A. Balkema, Li…
Stuyfzand	1998	Well, shaft & borehole recharge	ASR/ ASTR	EASY-LEACHER				x		GP, WQ	Geochemical Processes		Netherlands	Stuyfzand, P.J., 1998. Simple models for reactive transport of pollutants and main constituents during artificial recharge and bank filtration, in: International Symposium on Artificial Recharge of Ground Water, Peters, J.H. (Eds.), Artificial Recharge of Groundwater: Proceedings of the Third International Symposium on Artificial Recharge of Groundwater : TISAR 98, Amsterdam, Netherlands, 21-25 S…
Stuyfzand and Pyne	2012	Well, shaft & borehole recharge	ASR/ ASTR	analytical semi-empirical transport				x		GP, WQ	Geochemical Processes		USA	Stuyfzand, P.J., Pyne, R.D.G., 2012. Arsenic behavior in SW Florida ASR systems and its expert modeling, in: Draeger, M. (Ed.), Achieving Groundwater Supply Sustainability & Reliability through Managed Aquifer Recharge - Proceedings of the Symosium ISMAR 7, 9-13 October 2009, Abu Dhabi, UAE. Abu Dhabi, UAE, pp. 178–187.
Stuyfzand et al.	2007	Spreading methods	Infiltration ponds & basins	EASY-LEACHER				x		GP	Geochemical Processes		Netherlands	Stuyfzand, P.J., Kortleve, M., Olsthoorn, T.N., Rolf, H., 2007a. ACCUMULATION AND LEACHING DURING ARTIFICIAL RECHARGE COMPARED TO A NATURAL RECHARGE SYSTEM, IN THE NETHERLANDS, in: Fox, P. (Ed.), Management of Aquifer Recharge for Sustainability: Proceedings of the 6th International Symposium on Managed Artificial Recharge of Groundwater, ISMAR6, Phoenix, Arizona USA October 28 - November 2, 2007…
Stuyfzand et al.	2007	Well, shaft & borehole recharge	ASR/ ASTR	PHREEQC				x		GP, C	Geochemical Processes		Netherlands	Stuyfzand, P.J., Wilem Kooiman, J., Oosterhof, A., Raat, K.J., 2007b. Problems and solutions when recharging brackish aquifers with membrane concentrate from a less brackish groundwater source, in: Fox, P. (Ed.), Management of Aquifer Recharge for Sustainability: Proceedings of the 6th International Symposium on Managed Artificial Recharge of Groundwater, ISMAR6, Phoenix, Arizona USA October 28 -…
Stuyfzand et al.	2006	Well, shaft & borehole recharge	ASR/ ASTR	EL-ASR				x		GP, WQ	Geochemical Processes		Netherlands	Stuyfzand, P.J., Wakker, J.C., Putters, B., 2006. Water quality changes during Aquifer Storage and Recovery (ASR): results from pilot Herten (Netherlands), and their implications for modeling, in: UNESCO (Ed.), Recharge Systems for Protecting and Enhancing Groundwater Resources - Proceedings of the 5th International Symposium on Management of Aquifer Recharge ISMAR5, Berlin, Germany, 11–16 June 2…
Ting et al.	2006	Spreading methods	Infiltration ponds & basins	TOUGH2	x	x				GM	Impact on Groundwater		Taiwan	Ting, C.-S., Lee, C.H., Lin, C.Y., Chen, S.H., Chang, K.C., 2006. Infiltration mechanism of artificial recharge of groundwater – A case study at Pingtung Plain, Taiwan, in: UNESCO (Ed.), Recharge Systems for Protecting and Enhancing Groundwater Resources - Proceedings of the 5th International Symposium on Management of Aquifer Recharge ISMAR5, Berlin, Germany, 11–16 June 2005, ISMAR Proceedings. …
Tompson et al.	1999	Spreading methods	Infiltration ponds & basins	2D FD saturated flow model, ParFlow FV (3D), transport (flow paths)	x		x			WQ, RT, SI, GM	Impact on Groundwater		USA	Tompson, A.F.B., Carle, S.F., Rosenberg, N.D., Maxwell, R.M., 1999. Analysis of groundwater migration from artificial recharge in a large urban aquifer: A simulation perspective. Water Resources Research 35, 2981–2998. doi:10.1029/1999WR900175
Toze et al.	2010	Spreading methods	Reverse Drainage method	MODFLOW, MT3DMS	x		x			WQ, RA	Geochemical Processes		Australia	Toze, S., Bekele, E., Page, D., Sidhu, J., Shackleton, M., 2010. Use of static Quantitative Microbial Risk Assessment to determine pathogen risks in an unconfined carbonate aquifer used for Managed Aquifer Recharge. Water Research 44, 1038–1049. doi:10.1016/j.watres.2009.08.028
Vacher et al.	2006	Well, shaft & borehole recharge	ASR/ ASTR	MODFLOW, MT3D	x		x			RE	Recovery efficiency		USA	Vacher, H.L., Hutchings, W.C., Budd, D.A., 2006. Metaphors and Models: The ASR Bubble in the Floridan Aquifer. Ground Water 44, 144–154. doi:10.1111/j.1745-6584.2005.00114.x
Valley et al.	2006	In-channel modifications	Recharge dam	MODFLOW	x					RE	Recovery efficiency		Italy	Valley, S., Landini, F., Pranzini, G., Puppini, U., Scardazzi, M.E., Streetly, M.J., 2006. Transient flow modelling of an overexploited aquifer and simulation of artificial recharge measures, in: UNESCO (Ed.), Recharge Systems for Protecting and Enhancing Groundwater Resources - Proceedings of the 5th International Symposium on Management of Aquifer Recharge ISMAR5, Berlin, Germany, 11–16 June 20…
Valley et al.	2006	Well, shaft & borehole recharge	ASR/ ASTR	MODFLOW	x					GM, F	Impact on Groundwater		Italy	Valley, S., Landini, F., Pranzini, G., Puppini, U., Scardazzi, M.E., Streetly, M.J., 2006. Transient flow modelling of an overexploited aquifer and simulation of artificial recharge measures, in: UNESCO (Ed.), Recharge Systems for Protecting and Enhancing Groundwater Resources - Proceedings of the 5th International Symposium on Management of Aquifer Recharge ISMAR5, Berlin, Germany, 11–16 June 20…
van Ginkel et al.	2012	Well, shaft & borehole recharge	ASR/ ASTR	SEAWAT, analytical solution	xx					F, GM, SI	Impact on Groundwater		Egypt	van Ginkel, M., Olsthoorn, T.N., Smidt, E., Darwish, R., Rashwan, S., 2012. Fresh Storage Salines Extraction (FSSE) wells, feasibility of freshwater storage in saline aquifer with a focus on the Red Sea coast, Egypt, in: Draeger, M. (Ed.), Achieving Groundwater Supply Sustainability & Reliability through Managed Aquifer Recharge - Proceedings of the Symosium ISMAR 7, 9-13 October 2009, Abu Dhabi,…
Van Hoorick et al.	1998	Spreading methods	Infiltration ponds & basins	CXTFIT CDE (convection dispersion equation), PNE (physical nonequilibrium), CNE (chemical nonequilibrium)			x			WQ, GP	Geochemical Processes		Laboratory experiment	Van Hoorick, M., Feyen, J., Pussemier, I., 1998. Experimental and numerical analysis of atrazine behaviour in an artifical recharge site, in: International Symposium on Artificial Recharge of Ground Water, Peters, J.H. (Eds.), Artificial Recharge of Groundwater: Proceedings of the Third International Symposium on Artificial Recharge of Groundwater : TISAR 98, Amsterdam, Netherlands, 21-25 Septemb…
Vandenbohede and Van Houtte	2012	Spreading methods	Infiltration ponds & basins	SEAWAT	x		x			GM, RT	Impact on Groundwater		Belgium	Vandenbohede, A., Van Houtte, E., 2012. Heat transport and temperature distribution during managed artificial recharge with surface ponds. Journal of Hydrology 472-473, 77–89. doi:10.1016/j.jhydrol.2012.09.028
Vandenbohede et al.	2008	Spreading methods	Infiltration ponds & basins	MOCDENS3D	x		x			GM	Impact on Groundwater		Belgium	Vandenbohede, A., Van Houtte, E., Lebbe, L., 2008. Groundwater flow in the vicinity of two artificial recharge ponds in the Belgian coastal dunes. Hydrogeology Journal 16, 1669–1681. doi:10.1007/s10040-008-0326-x
Vandenbohede et al.	2013	Spreading methods	Infiltration ponds & basins	SEAWAT, PHT3D	x		x	x		GP, RT	Geochemical Processes		Belgium	Vandenbohede, A., Wallis, I., Van Houtte, E., Van Ranst, E., 2013. Hydrogeochemical transport modeling of the infiltration of tertiary treated wastewater in a dune area, Belgium. Hydrogeology Journal 21, 1307–1321. doi:10.1007/s10040-013-1008-x
Vanderzalm et al.	2007	Well, shaft & borehole recharge	ASR/ ASTR	@Risk				x		WQ, RA	Geochemical Processes		Australia	Vanderzalm, J.L., Dillon, P., Marvanek, S., Page, D., 2007. Over 100 years of drinking stormwater treated through MAR: Assessing the risks of stormwater recharge on the quality of Blue Lake, in: Fox, P. (Ed.), Management of Aquifer Recharge for Sustainability: Proceedings of the 6th International Symposium on Managed Artificial Recharge of Groundwater, ISMAR6, Phoenix, Arizona USA October 28 - No…
Vanderzalm et al.	2010	Well, shaft & borehole recharge	ASR/ ASTR	PHREEQC				x		GP, WQ, F	Geochemical Processes		Australia	Vanderzalm, J.L., Page, D.W., Barry, K.E., Dillon, P.J., 2010. A comparison of the geochemical response to different managed aquifer recharge operations for injection of urban stormwater in a carbonate aquifer. Applied Geochemistry 25, 1350–1360. doi:10.1016/j.apgeochem.2010.06.005
Vanderzalm et al.	2013	Well, shaft & borehole recharge	ASR/ ASTR	PHREEQC				x		GP, C	Geochemical Processes		Australia	Vanderzalm, J., Smitt, C., Barry, K., Dillon, P., Davidge, S., Gornall, D., Seear, H., Ife, D., 2013. Potential for Injection Well Clogging in an Anoxic Sandstone Aquifer Receiving Gresh, Deoxygenated but Chlorinated Injectant, in: Martin, R. (Ed.), Clogging Issues Associated with Managed Aquifer Recharge Methods. IAH Commission on Managing Aquifer Recharge, Australia, pp. 34–49.
Vanderzalm et al.	2013	Well, shaft & borehole recharge	ASR/ ASTR	Probabilistic approach				x		WQ	Geochemical Processes		Australia	Vanderzalm, J.L., Page, D.W., Barry, K.E., Dillon, P.J., 2013. Application of a probabilistic modelling approach for evaluation of nitrogen, phosphorus and organic carbon removal efficiency during four successive cycles of aquifer storage and recovery (ASR) in an anoxic carbonate aquifer. Water Research 47, 2177–2189. doi:10.1016/j.watres.2013.01.038
Vidanaarchchi et al.	1998	Spreading methods	Reverse Drainage method	MODFLOW (PMWIN), MODPATH	x					O	Optimization/Planning of System		Netherlands	Vidanaarchchi, C.K., Zhou, Y., Nonner, J.C., Meijer, S.E., 1998. Optimisation of artificial groudnwater recharge system with infiltration galleries, in: International Symposium on Artificial Recharge of Ground Water, Peters, J.H. (Eds.), Artificial Recharge of Groundwater: Proceedings of the Third International Symposium on Artificial Recharge of Groundwater : TISAR 98, Amsterdam, Netherlands, 21…
Virtue	2013	Well, shaft & borehole recharge	ASR/ ASTR	MODFLOW (GMS)	x					GM	Optimization/Planning of System	Impact on Groundwater	Australia	Virtue, D., 2013. Aquifer Storage and Recovery (ASR) Environmental Effects Report (EER) Supplement. Glenorchy City Council, Australia.
Wallbridge&Gilbert	2009	Spreading methods	Infiltration ponds & basins	MUSIC, WaterCress					xx	O	Optimization/Planning of System		Australia	Wallbridge&Gilbert, 2009. Urban Stormwater Harvesting Options Study (No. C081266).
Wallbridge&Gilbert	2009	Well, shaft & borehole recharge	ASR/ ASTR	MUSIC, WaterCress					xx	O	Optimization/Planning of System		Australia	Wallbridge&Gilbert, 2009. Urban Stormwater Harvesting Options Study (No. C081266).
Wallis et al.	2010	Well, shaft & borehole recharge	ASR/ ASTR	PHT3D	x		x	x		WQ, GP, GM	Geochemical Processes		Netherlands	Wallis, I., Prommer, H., Simmons, C.T., Post, V., Stuyfzand, P.J., 2010. Evaluation of Conceptual and Numerical Models for Arsenic Mobilization and Attenuation during Managed Aquifer Recharge. Environmental Science & Technology 44, 5035–5041. doi:10.1021/es100463q
Wallis et al.	2012	Well, shaft & borehole recharge	ASR/ ASTR	PHT3D			x	x		WQ, GP	Geochemical Processes		Netherlands	Wallis, I., Prommer, H., Simmons, C.T., Post, V., Stuyfzand, P.J., 2012. Numerical evaluation of arsenic behaviour during deep well injection, in: Draeger, M. (Ed.), Achieving Groundwater Supply Sustainability & Reliability through Managed Aquifer Recharge - Proceedings of the Symosium ISMAR 7, 9-13 October 2009, Abu Dhabi, UAE. Abu Dhabi, UAE, pp. 156–161.
Wallis et al.	2011	Well, shaft & borehole recharge	ASR/ ASTR	MODFLOW, PHT3D	x		x	x		WQ, GP	Geochemical Processes		USA	Wallis, I., Prommer, H., Pichler, T., Post, V., B. Norton, S., Annable, M.D., Simmons, C.T., 2011. Process-Based Reactive Transport Model To Quantify Arsenic Mobility during Aquifer Storage and Recovery of Potable Water. Environmental Science & Technology 45, 6924–6931. doi:10.1021/es201286c
Wang et al.	2014	Spreading methods	Infiltration ponds & basins	PHREEQC				x		SAT, WQ, GP	Impact on Groundwater		China	Wang, S., Tang, C., Song, X., Wang, Q., Zhang, Y., Yuan, R., 2014. The impacts of a linear wastewater reservoir on groundwater recharge and geochemical evolution in a semi-arid area of the Lake Baiyangdian watershed, North China Plain. Science of The Total Environment 482-483, 325–335. doi:10.1016/j.scitotenv.2014.02.130
Ward et al.	2007	Well, shaft & borehole recharge	ASR/ ASTR	FEFLOW	x		x			RE, GM, SI	Recovery efficiency	Impact on Groundwater	Theoretical Analysis	Ward, J.D., Simmons, C.T., Dillon, P.J., 2007. A theoretical analysis of mixed convection in aquifer storage and recovery: How important are density effects? Journal of Hydrology 343, 169–186. doi:10.1016/j.jhydrol.2007.06.011
Ward et al.	2008	Well, shaft & borehole recharge	ASR/ ASTR	FEFLOW	x		x			RE, SI	Recovery efficiency		Theoretical Analysis	Ward, J.D., Simmons, C.T., Dillon, P.J., 2008. Variable-density modelling of multiple-cycle aquifer storage and recovery (ASR): Importance of anisotropy and layered heterogeneity in brackish aquifers. Journal of Hydrology 356, 93–105. doi:10.1016/j.jhydrol.2008.04.012
Ward et al.	2009	Well, shaft & borehole recharge	ASR/ ASTR	FEFLOW	x		x			RE, SI	Recovery efficiency		Theoretical analysis	Ward, J.D., Simmons, C.T., Dillon, P.J., Pavelic, P., 2009. Integrated assessment of lateral flow, density effects and dispersion in aquifer storage and recovery. Journal of Hydrology 370, 83–99. doi:10.1016/j.jhydrol.2009.02.055
Wett	2006	Induced bank filtration	Riverbank filtration	MODFLOW, MT3D	x		x			GP, C	Geochemical Processes		Austria	Wett, B., 2006. Monitoring Clogging of a RBF-System at the river Enns, Austria, in: Hubbs, S. (Ed.), Riverbank Filtration Hydrology, Nato Science Series: IV: Earth and Environmental Sciences. Springer Netherlands, pp. 155–177.
Wiese and Nützmann	2006	Induced bank filtration	Riverbank filtration	MODFLOW	x					RT, GM	Impact on Groundwater		Germany	Wiese, B., Nützmann, G., 2006. Hydraulic and transport modelling of bank filtration at Lake Tegel (Berlin), in: UNESCO (Ed.), Recharge Systems for Protecting and Enhancing Groundwater Resources - Proceedings of the 5th International Symposium on Management of Aquifer Recharge ISMAR5, Berlin, Germany, 11–16 June 2005, ISMAR Proceedings. pp. 449–454.
Willis-Jones and Brandes de Roos	2013	Well, shaft & borehole recharge	Dug well/ shaft/ pit injection	PHREEQC				x		GP, C	Geochemical Processes		Australia	Willis-Jones, B., Brandes de Roos, I., 2013. Application of Large Scale Managed Aquifer Recharge in Mine Water Management, Cloudbreak Mine, Western Australia, in: Martin, R. (Ed.), Clogging Issues Associated with Managed Aquifer Recharge Methods. IAH Commission on Managing Aquifer Recharge, Australia, pp. 156–162.
Yin et al.	2006	Spreading methods	Infiltration ponds & basins	MODFLOW, MT3DMS (reactive)	x			x		WQ, SAT	Geochemical Processes	Optimization/Planning of System	China	Yin, H., Xu, Z., Li, H., Li, S., 2006. Numerical modeling of wastewater transport and degradation in soil aquifer. Journal of Hydrodynamics, Ser. B 18, 597–605. doi:10.1016/S1001-6058(06)60141-8
Yobbi	1996	Well, shaft & borehole recharge	ASR/ ASTR	HST3D	x		x			RE, O, SI	Recovery efficiency	Optimization/Planning of System	USA	Yobbi, D.K., 1996. Simulation of subsurface storage and recovery of treated effluent injected in a saline aquifer, St. Petersburg, Florida, WRIR 95-4271. US Department of the Interior, US Geological Survey.
Yobbi	1997	Well, shaft & borehole recharge	ASR/ ASTR	HST3D	x		x			RE, SI	Recovery efficiency		USA	Yobbi, D.K., 1997. Simulation of Subsurface Storage and Recovery of Effluent Using Multiple Wells, St. Petersburg, Florida, WRIR 97-4024. US Department of the Interior, US Geological Survey.
Youngs et al.	2012	Well, shaft & borehole recharge	ASR/ ASTR	FEFLOW, PHREEQC	x			x		GP, D, SI	Geochemical Processes	Optimization/Planning of System	Australia	Youngs, J., Willis-Jones, B., Greenhalgh, D., Mcphee, A., Brown, D., 2012. Cloudbreak: the critical role of MAR in a major Pilbara mine water management scheme, in: Draeger, M. (Ed.), Achieving Groundwater Supply Sustainability & Reliability through Managed Aquifer Recharge - Proceedings of the Symosium ISMAR 7, 9-13 October 2009, Abu Dhabi, UAE. Abu Dhabi, UAE, pp. 538–545.
Zare and Koch	2014	Spreading methods	Excess Irrigation	MODFLOW	x					GM	Impact on Groundwater		Iran	Zare, M., Koch, M., 2014. 3D- groundwater flow modeling of the possible effects of the construction of an irrigation/drainage network on water logging in the Miandarband plain, Iran. Basic Research Journal of Soil and Environmental Scienc 2.
Zeelie	2002	Spreading methods	Infiltration ponds & basins	TRIWACO	x					GM	Impact on Groundwater		Namibia	Zeelie, S., 2002. OMDEL dam and recharge ponds to enhance recharge in the Namib Desert, in: Dillon, P. (Ed.), Management of Aquifer Recharge for Sustainability: Proceedings of the 4th International Symposium on Artificial Recharge of Groundwater. ISAR-4, Adelaide, South Australia, 22-26 September 2002, ISMAR Proceedings. A.A. Balkema, Lisse; Exton, PA, pp. 361–366.
Zhang et al.	2015	Well, shaft & borehole recharge	ASR/ ASTR	TOUGHREACT, TOUGHREACT	x		x	x		GP, WQ	Geochemical Processes	Impact on Groundwater	China	Zhang, W., Huan, Y., Yu, X., Liu, D., Zhou, J., 2015. Multi-component transport and transformation in deep confined aquifer during groundwater artificial recharge. Journal of Environmental Management 152, 109–119. doi:10.1016/j.jenvman.2015.01.027
Zheng et al.	2015	In-channel modifications	Recharge dam	FEFLOW	x		x			GM	Impact on Groundwater		China	Zheng, F., Liu, L., Li, B., Yang, Y., Guo, M., 2015. Effects of Reclaimed Water Use for Scenic Water on Groundwater Environment in a Multilayered Aquifer System beneath the Chaobai River, Beijing, China: Case Study. Journal of Hydrologic Engineering 20, B5014003. doi:10.1061/(ASCE)HE.1943-5584.0001052
Zuurbier et al.	2014	Well, shaft & borehole recharge	ASR/ ASTR	SEAWAT	x		x			GM, RE, SI	Impact on Groundwater	Recovery Efficiency	Netherlands	Zuurbier, K.G., Kooiman, J.W., Groen, M.M.A., Maas, B., Stuyfzand, P.J., 2015. Enabling Successful Aquifer Storage and Recovery of Freshwater Using Horizontal Directional Drilled Wells in Coastal Aquifers. Journal of Hydrologic Engineering 20, B4014003. doi:10.1061/(ASCE)HE.1943-5584.0000990
Zuurbier et al.	2015	Well, shaft & borehole recharge	ASR/ ASTR	SEAWAT	x		x			D, RE, SI	Optimization/Planning of System	Recovery Efficiency	Netherlands	Zuurbier, K.G., Zaadnoordijk, W.J., Stuyfzand, P.J., 2014. How multiple partially penetrating wells improve the freshwater recovery of coastal aquifer storage and recovery (ASR) systems: A field and modeling study. Journal of Hydrology 509, 430–441. doi:10.1016/j.jhydrol.2013.11.057
